# Supplementary material for: Electrophilic chemistry of propargylic alcohols in imidazolium ionic liquids: Propargylation of arenes and synthesis of propargylic ethers catalyzed by metallic triflates [Bi(OTf)3, Sc(OTf)3, Yb(OTf)3], TfOH, or B(C6F5)3
Source: Royal Society of Chemistry journal article supplement (doi:10.1039/c0ob00872a), 2011-01-01
Supplement: c0ob00872a.pdf [file c0ob00872a.pdf]

## Supplementary Data

### **Electrophilic Chemistry of Propargylic Alcohols in Imidazolium Ionic Liquids: Propargylation of Arenes and Synthesis of Propargylic Ethers Catalyzed by Metallic Triflates [Bi(OTf)<sub>3</sub>, Sc(OTf)<sub>3</sub>, Yb(OTf)<sub>3</sub>, TfOH, or B(C<sub>6</sub>F<sub>5</sub>)<sub>3</sub>]**

Gopalakrishnan Aridoss, Viorel D. Sarca, James Ponder, Jessica Crowe, Kenneth K. Laali\*

Department of Chemistry, University of North Florida, 1, UNF Drive, Jacksonville, Florida, 32224, USA

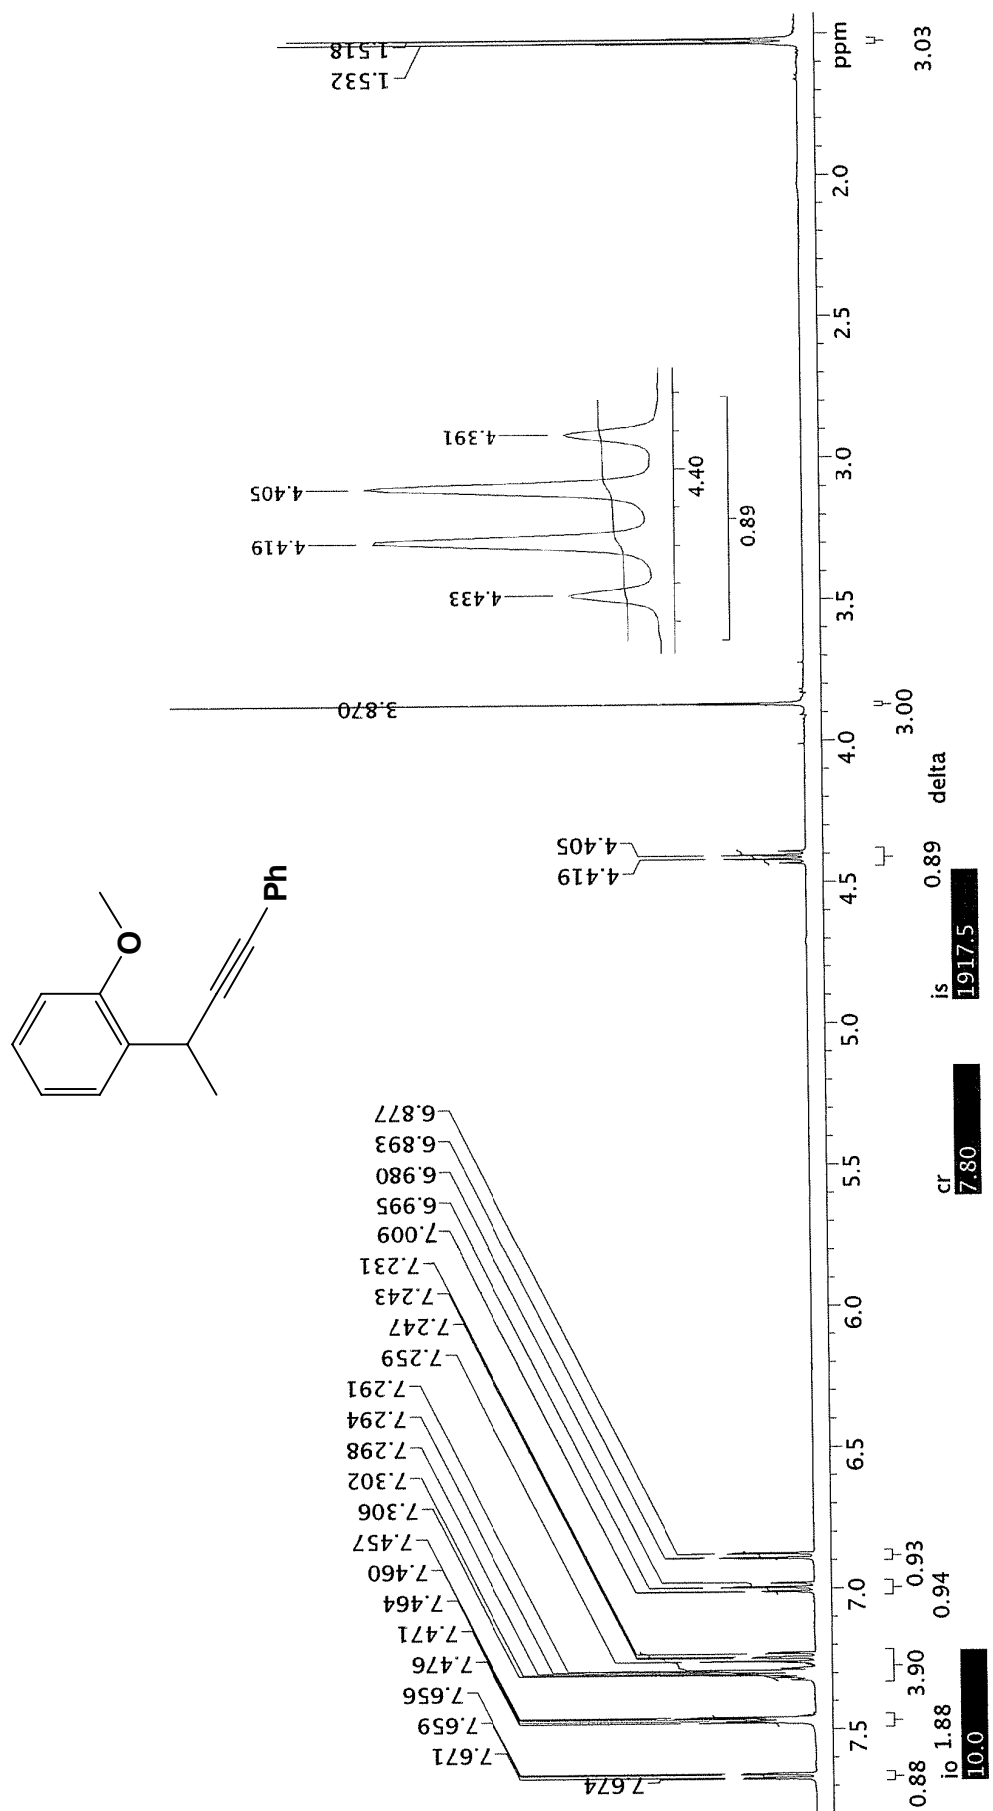

Figure 1.  $^1\text{H}$  NMR of compound 2

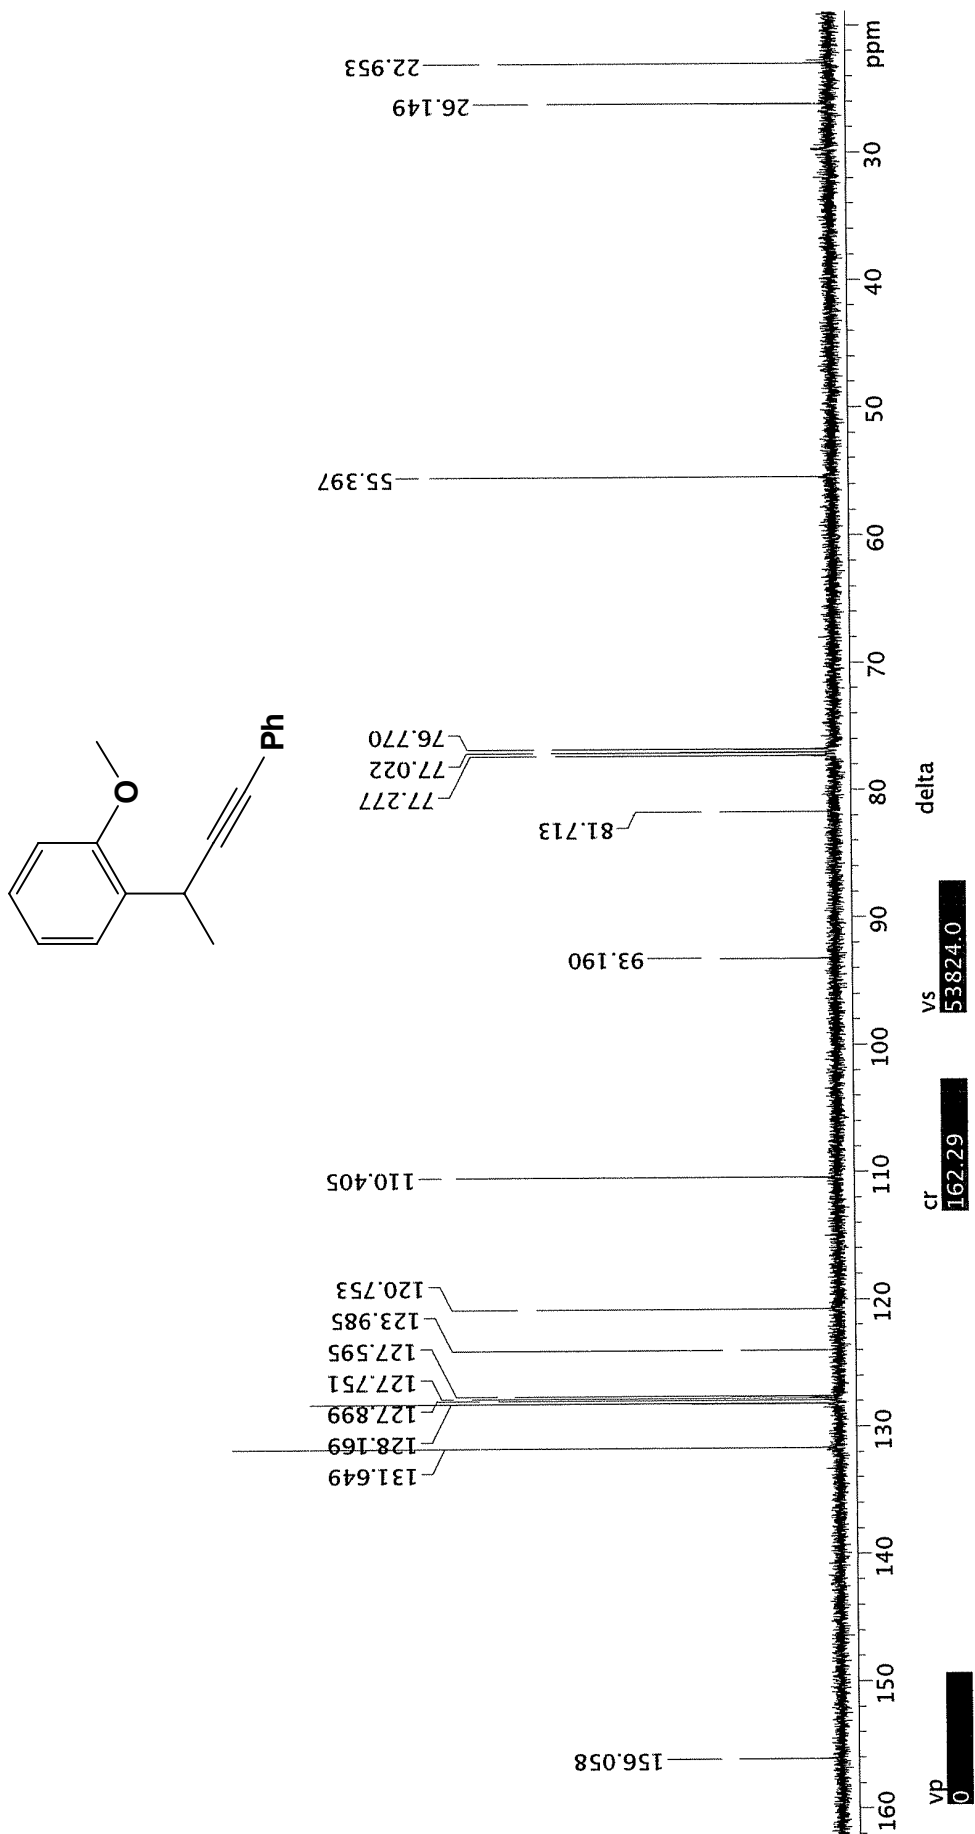

Figure 2.  $^{13}\text{C}$  NMR of compound 2

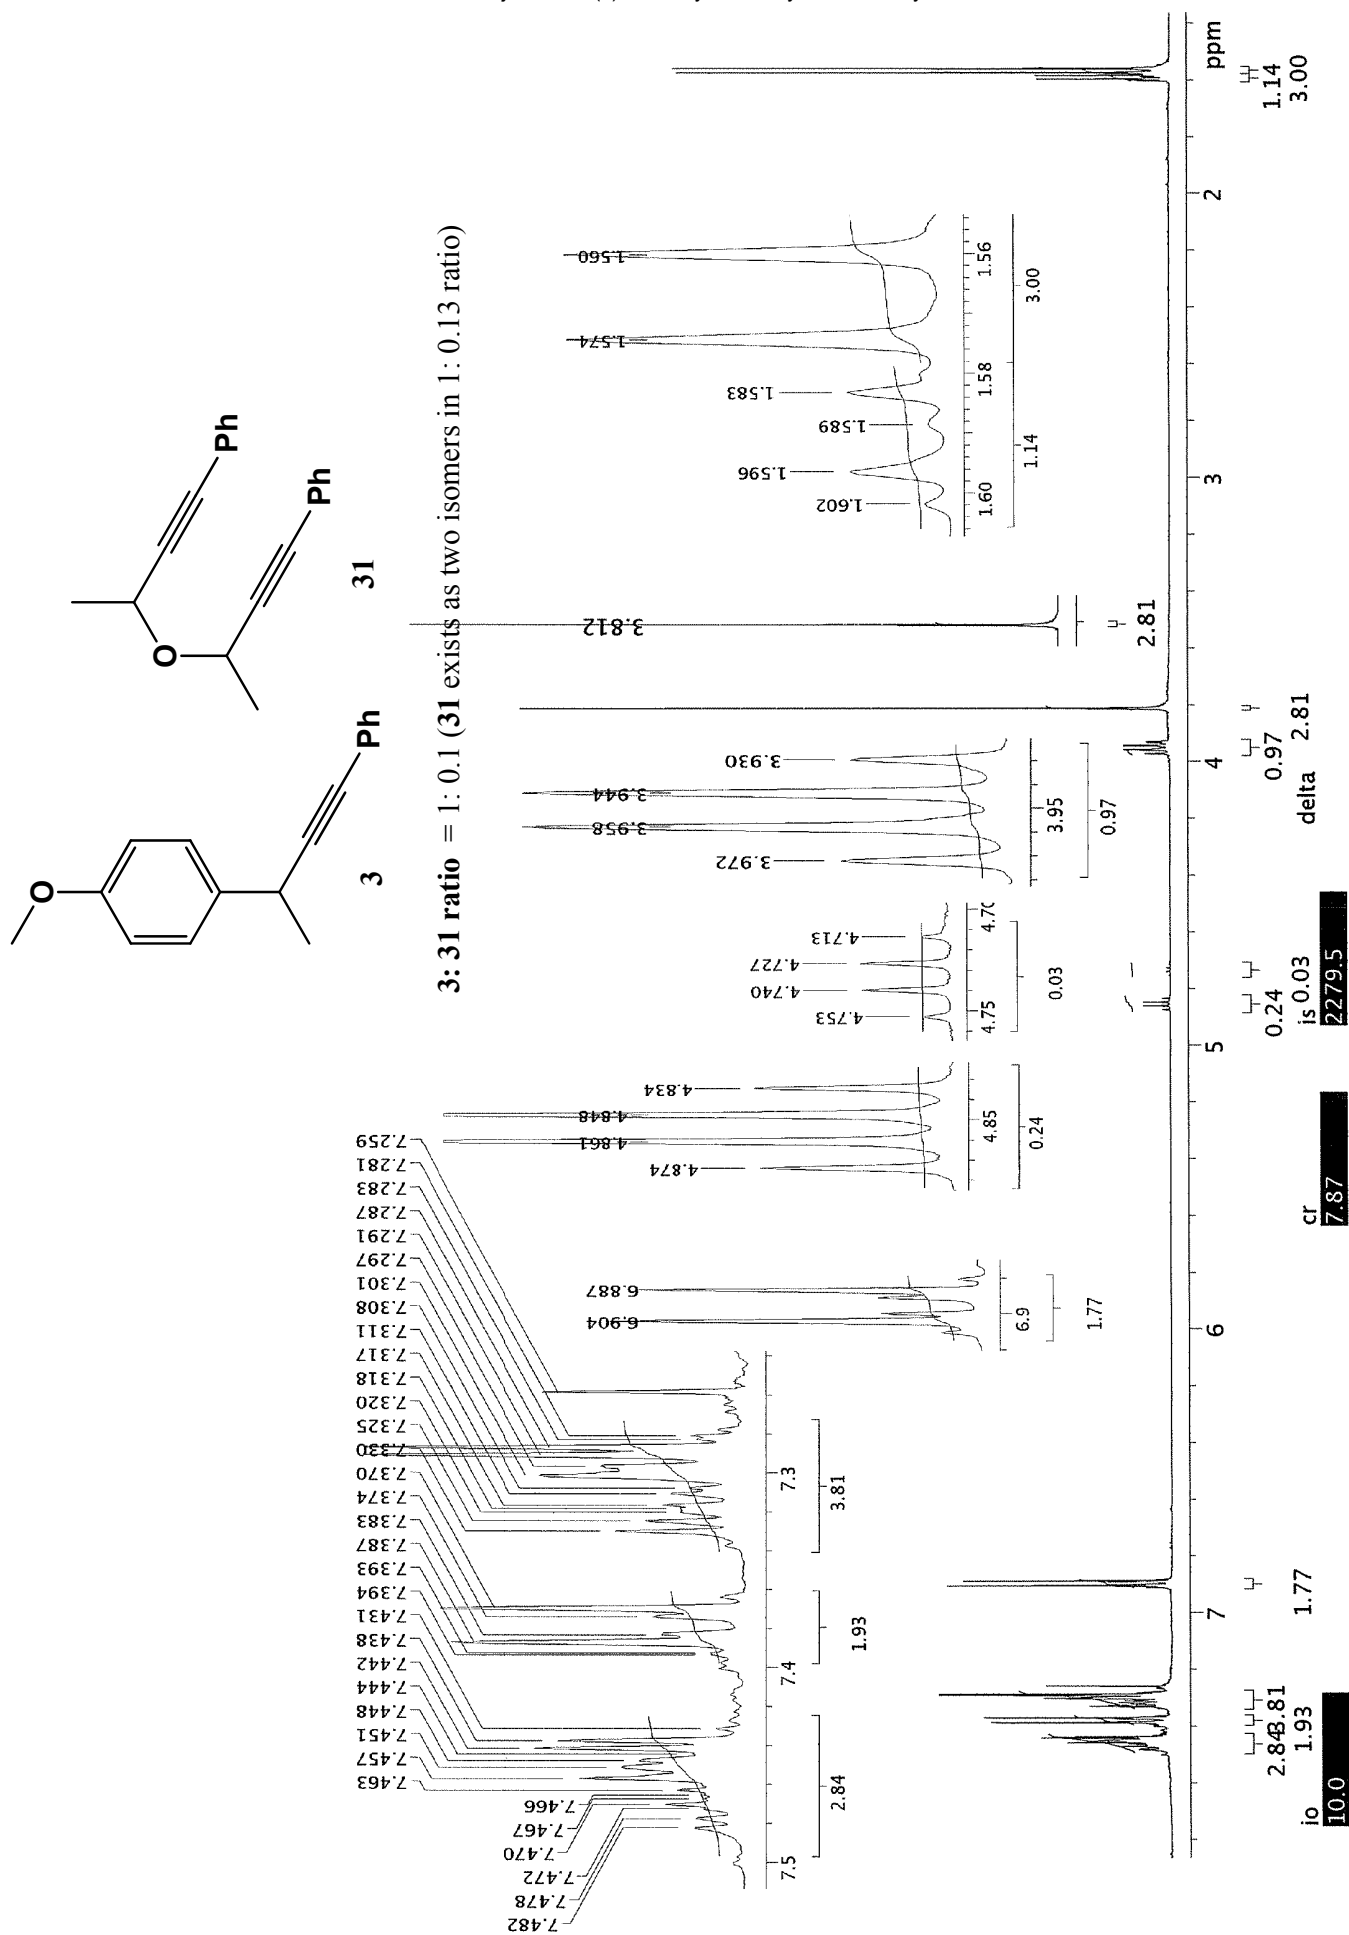

Figure 3. <sup>1</sup>H NMR of compound 3

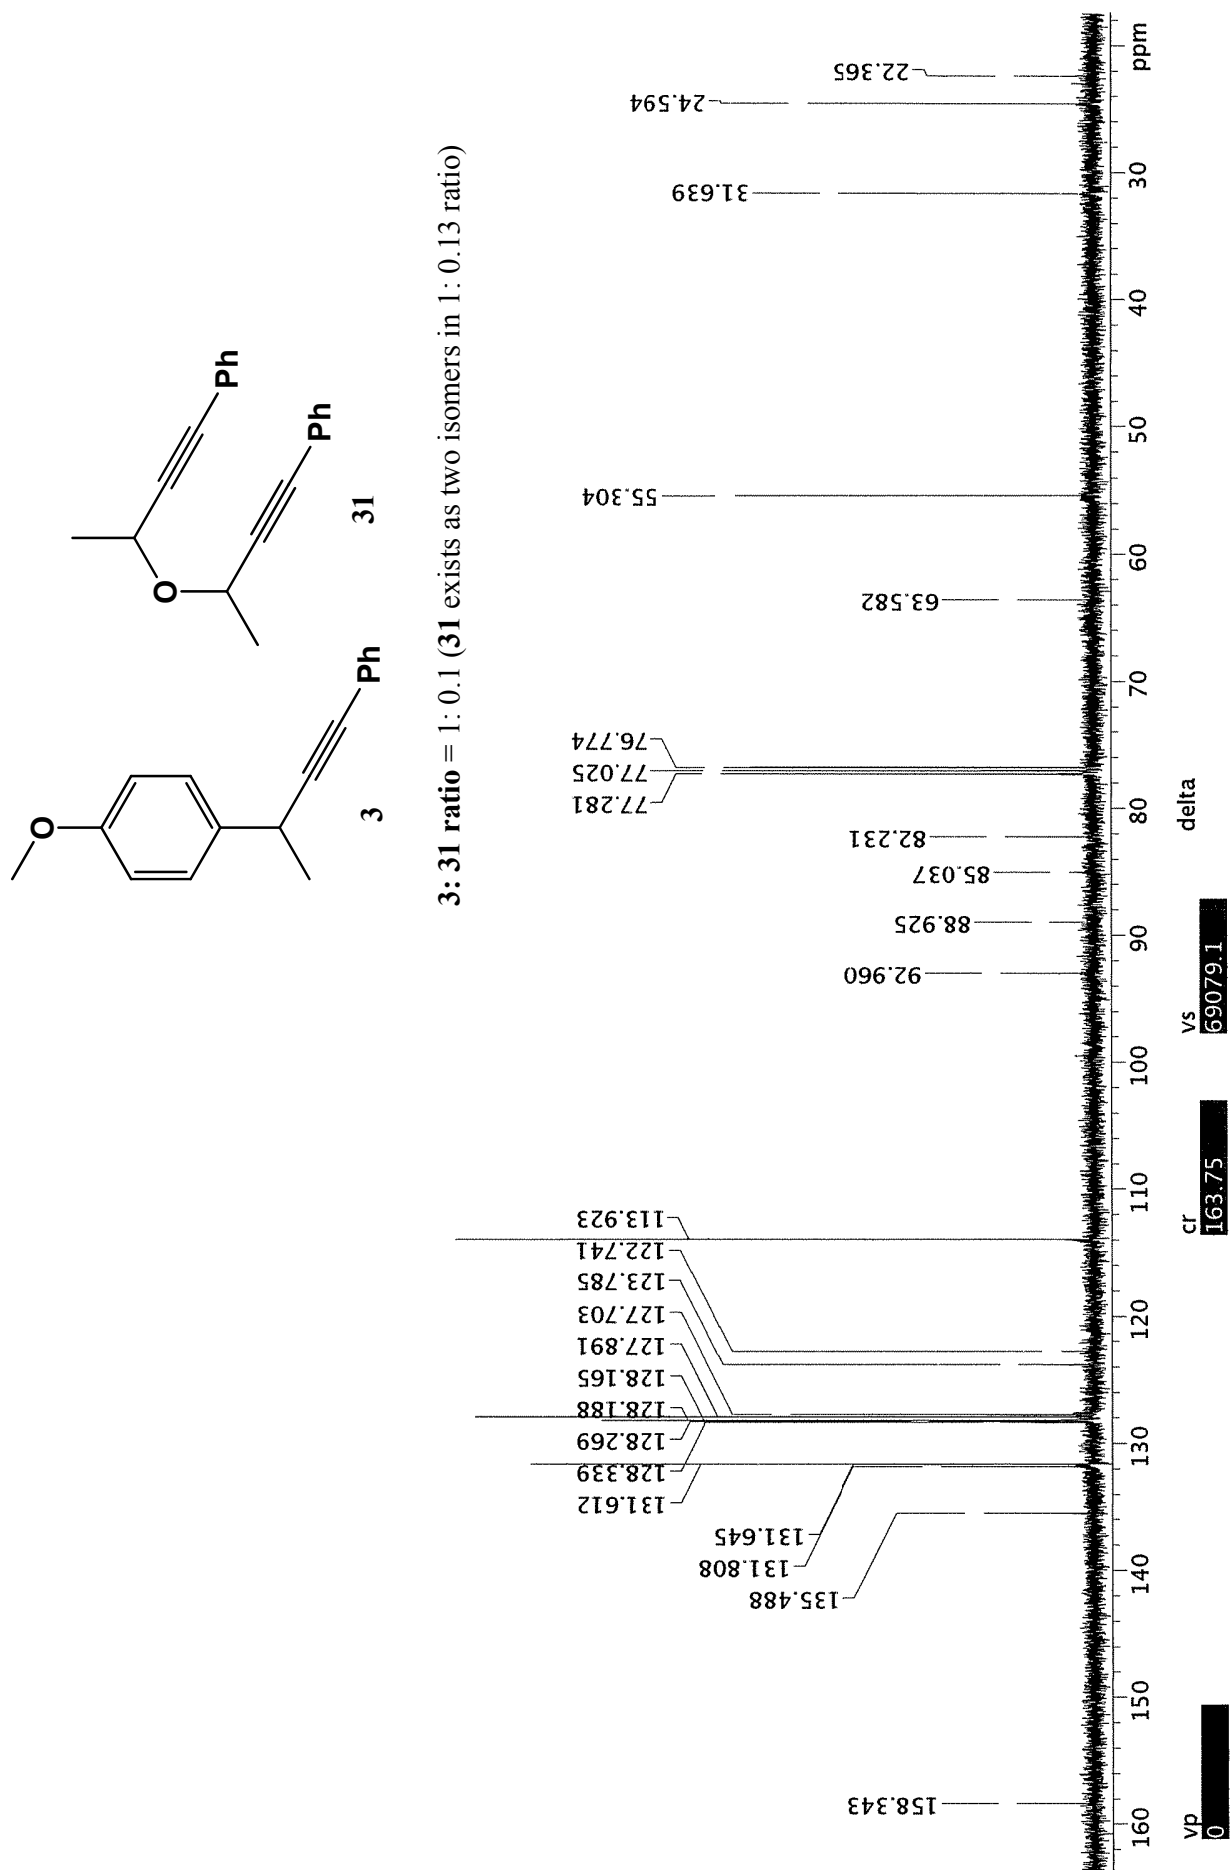

Figure 4. <sup>13</sup>C NMR of compound 3

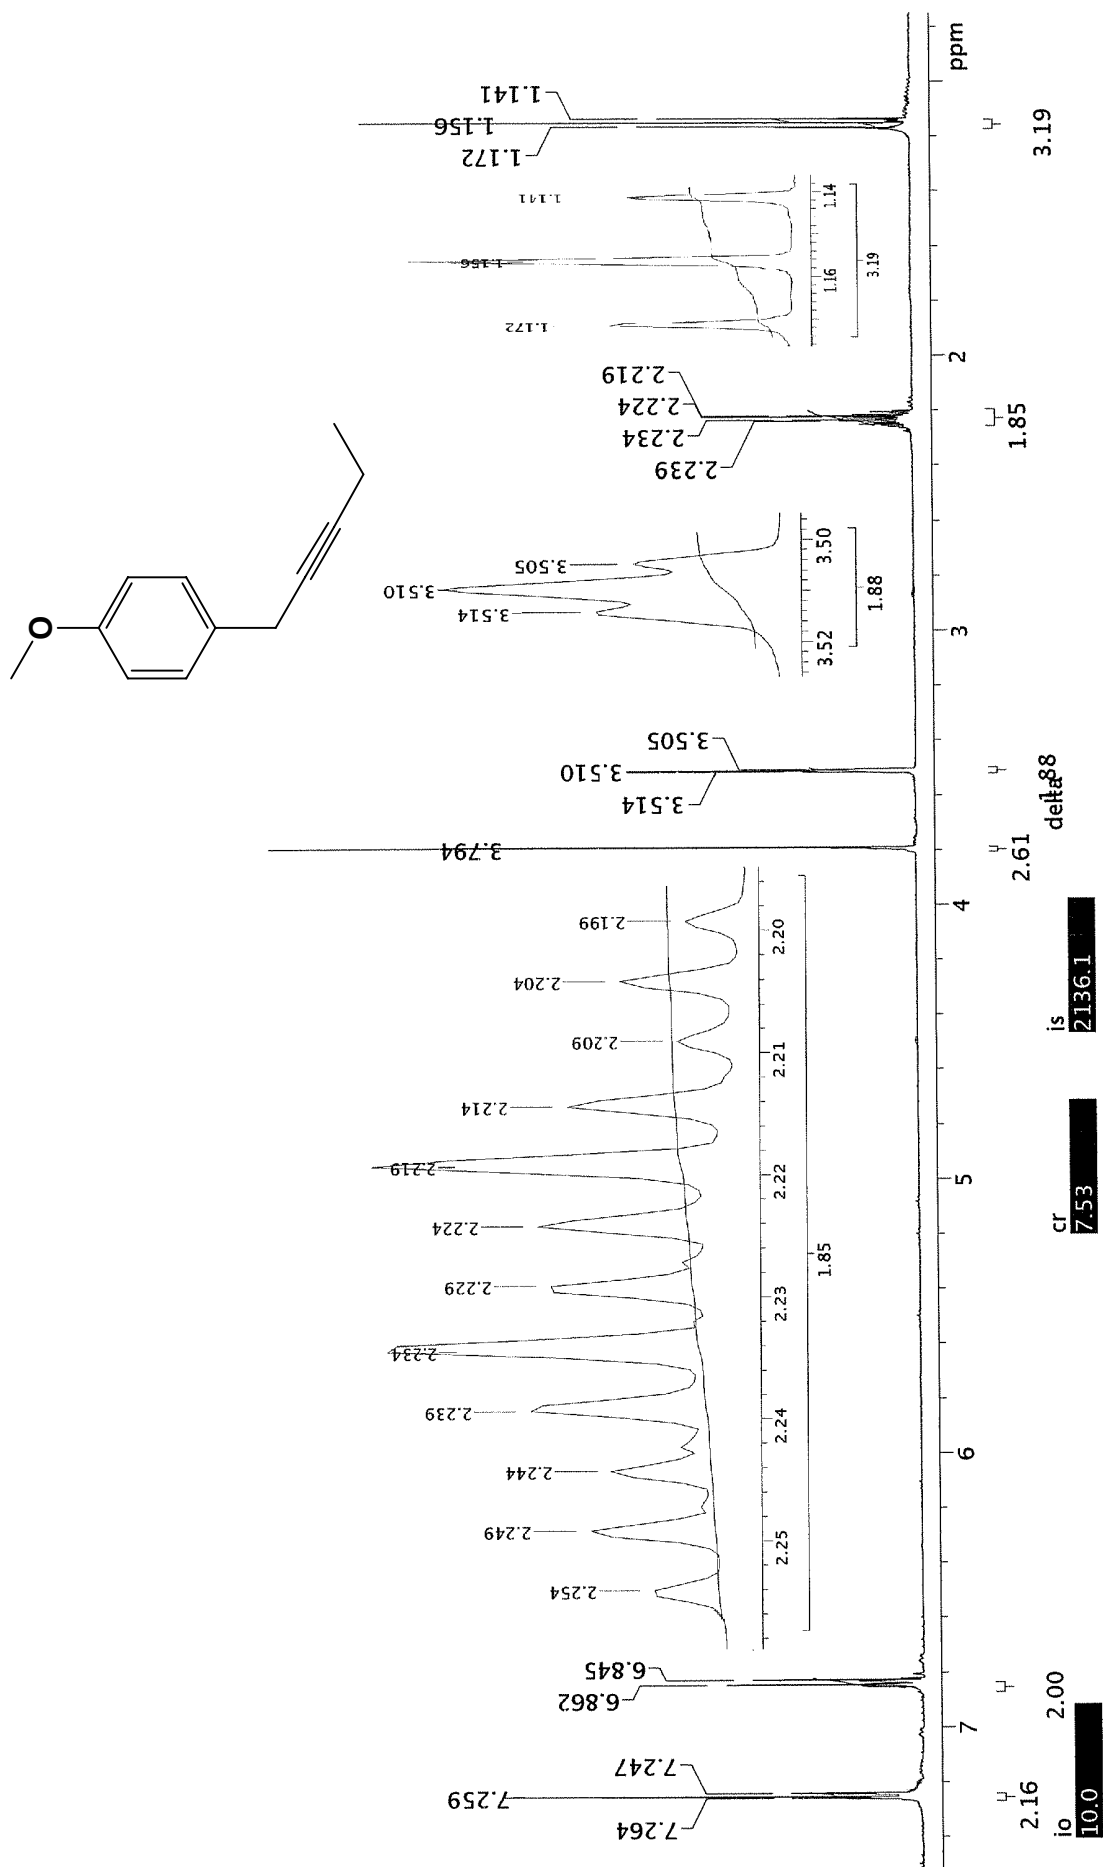

Figure 5. <sup>1</sup>H NMR of compound 4

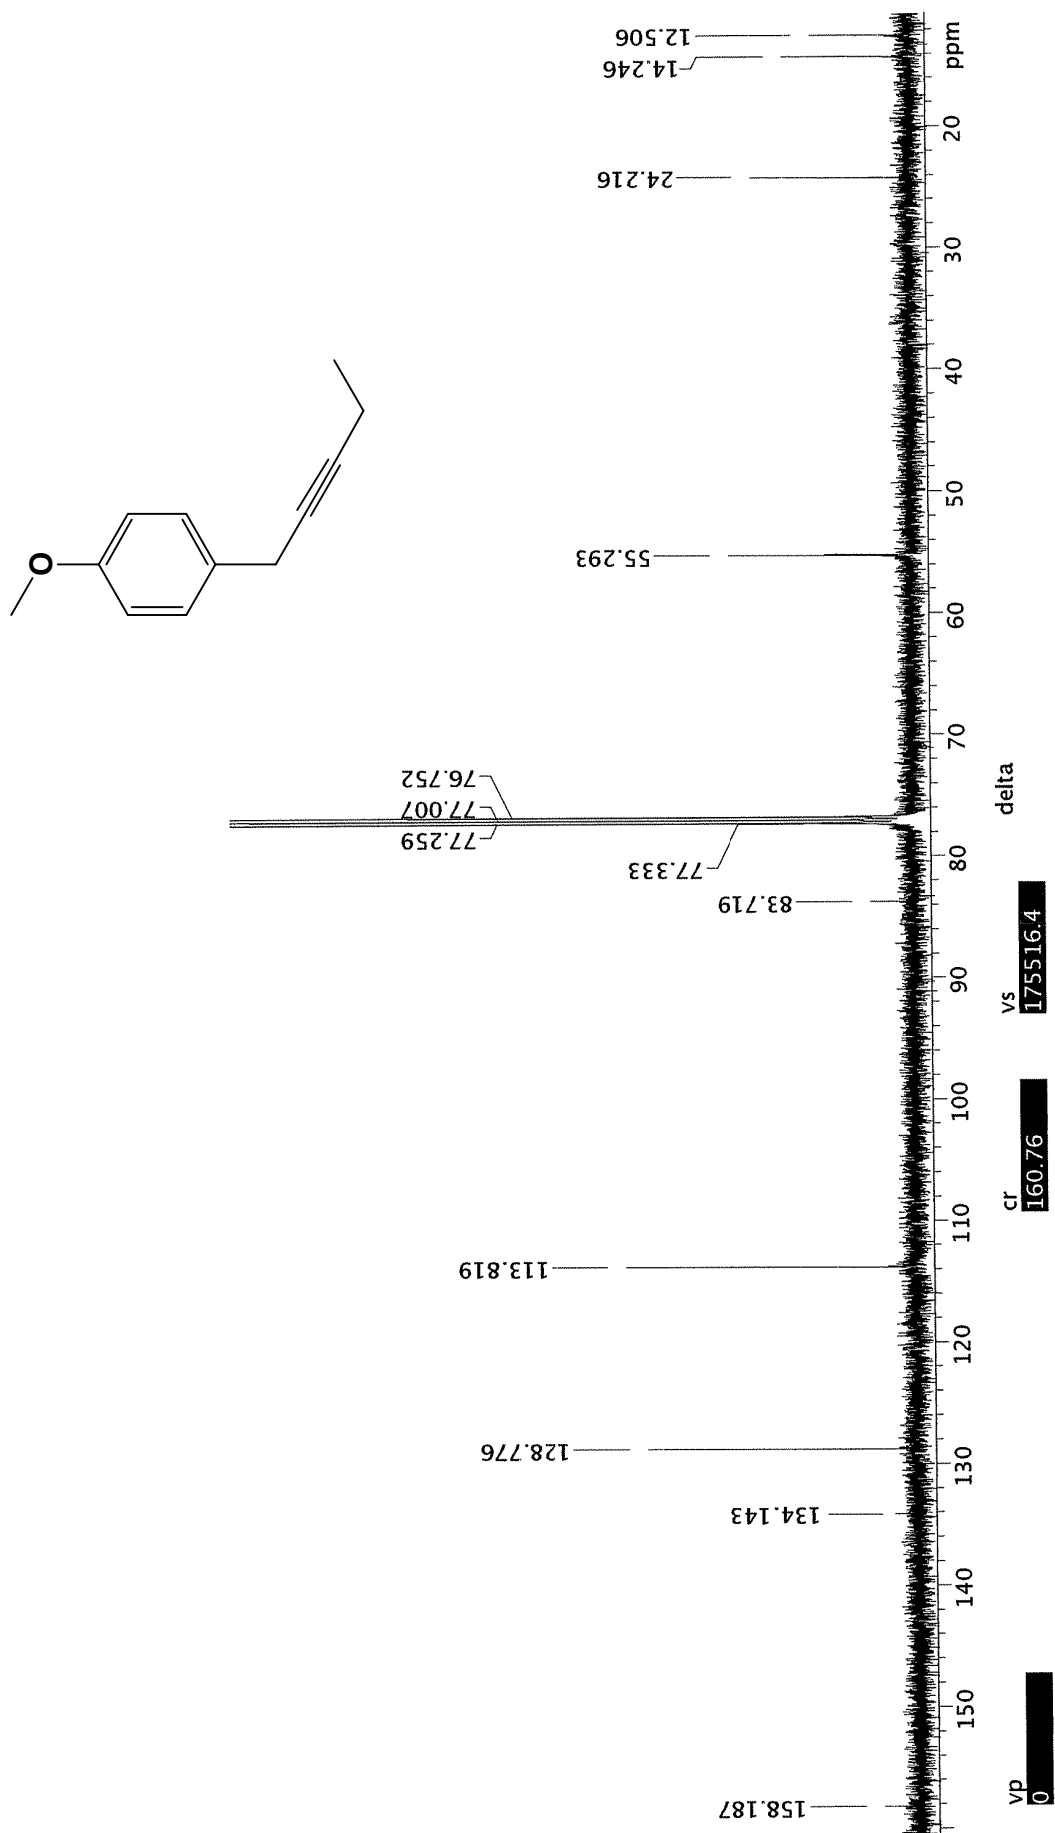

Figure 6. <sup>13</sup>C NMR of compound 4

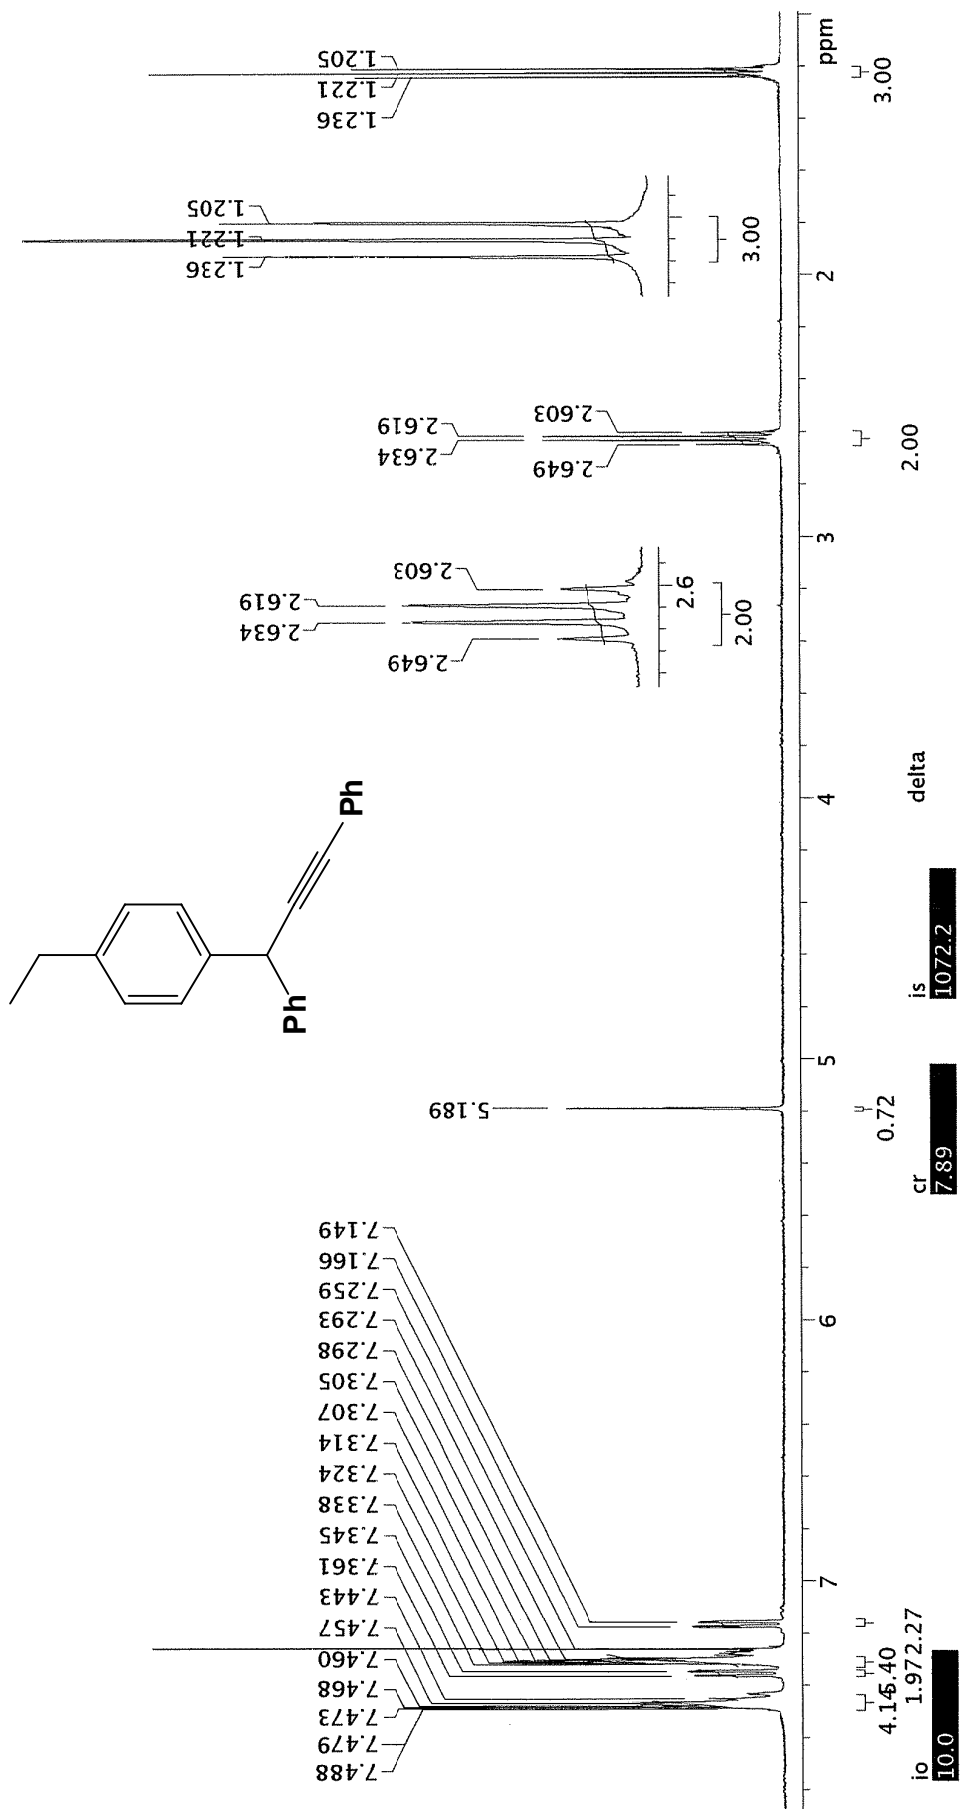

Figure 7. <sup>1</sup>H NMR of compound 10



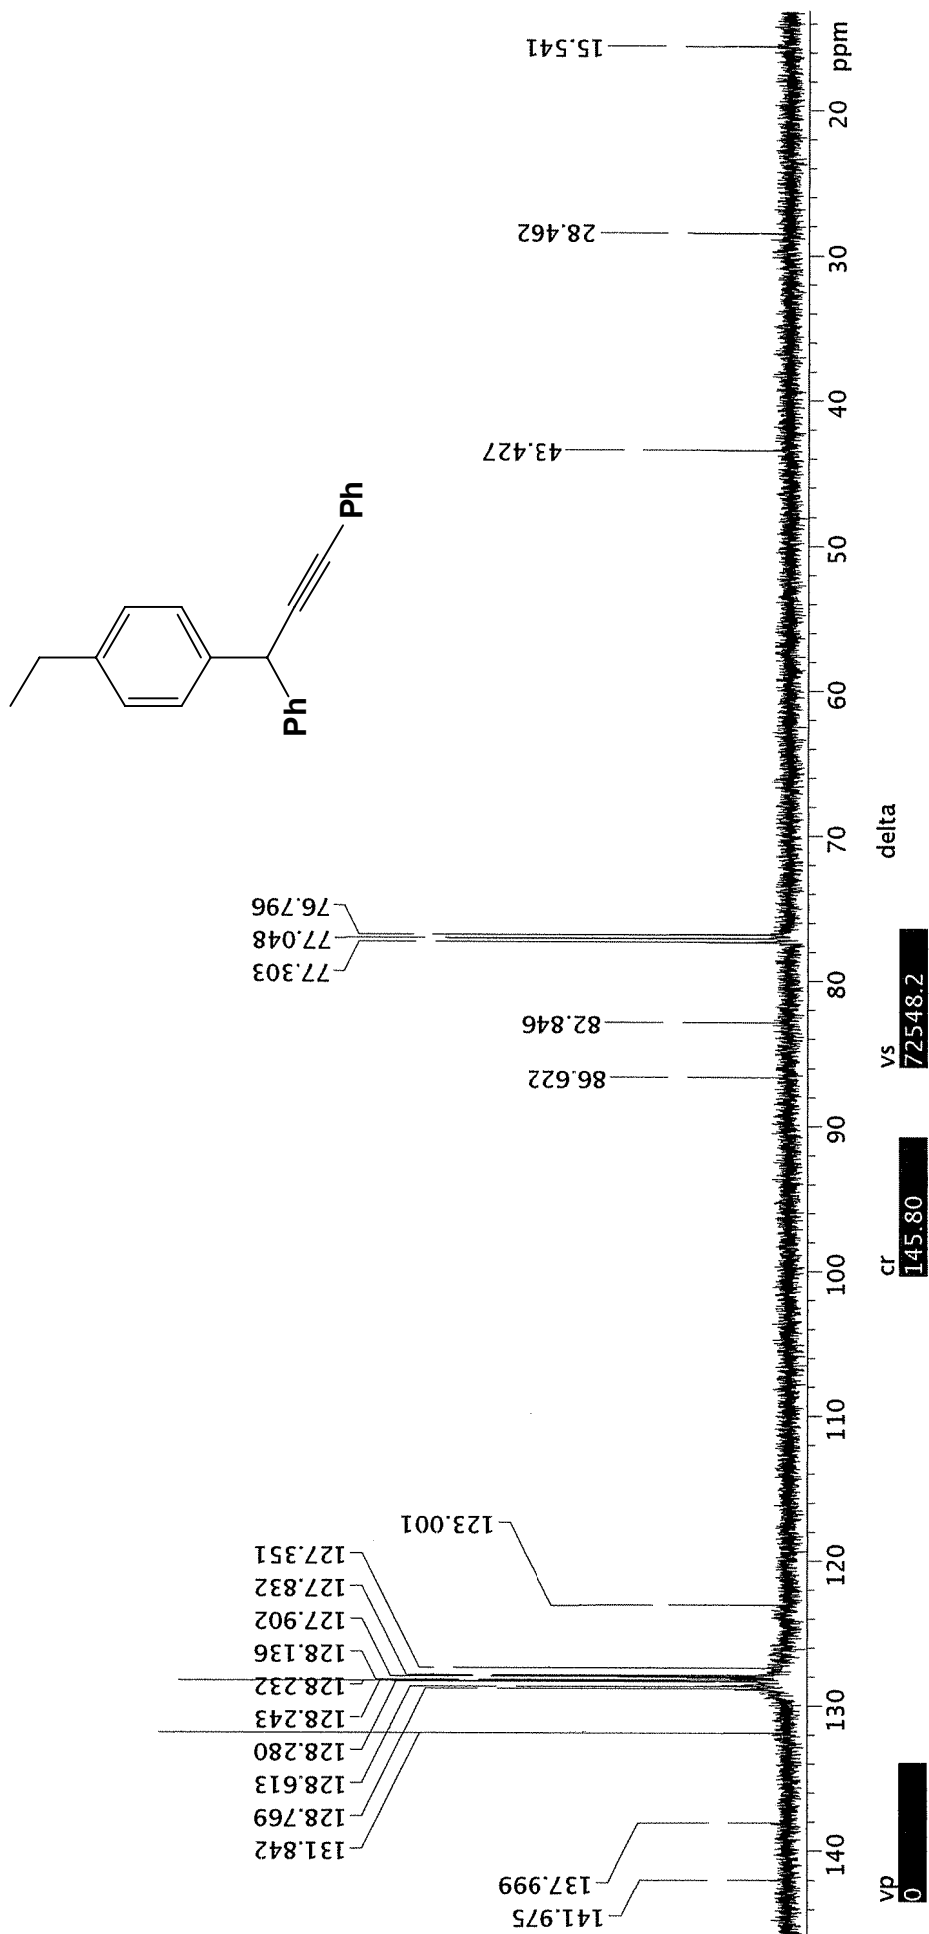

Figure 8.  $^{13}\text{C}$  NMR of compound 10

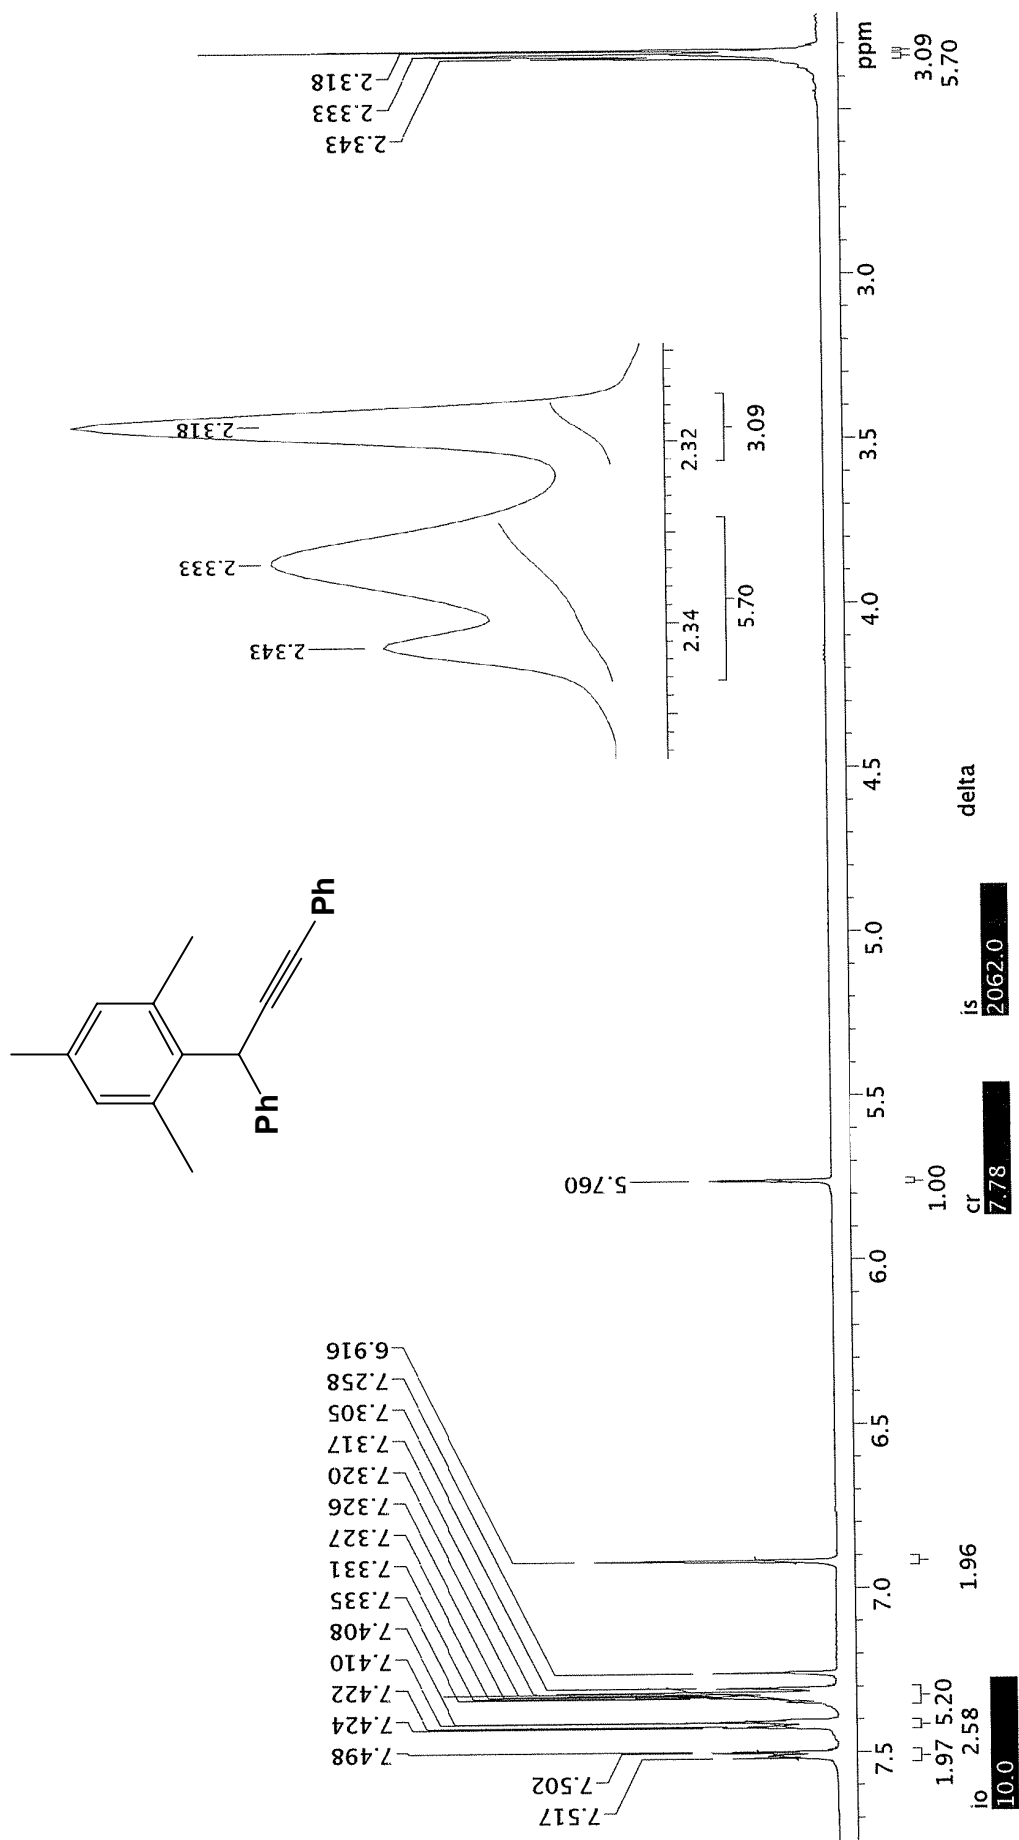

Figure 9. <sup>1</sup>H NMR of compound 11

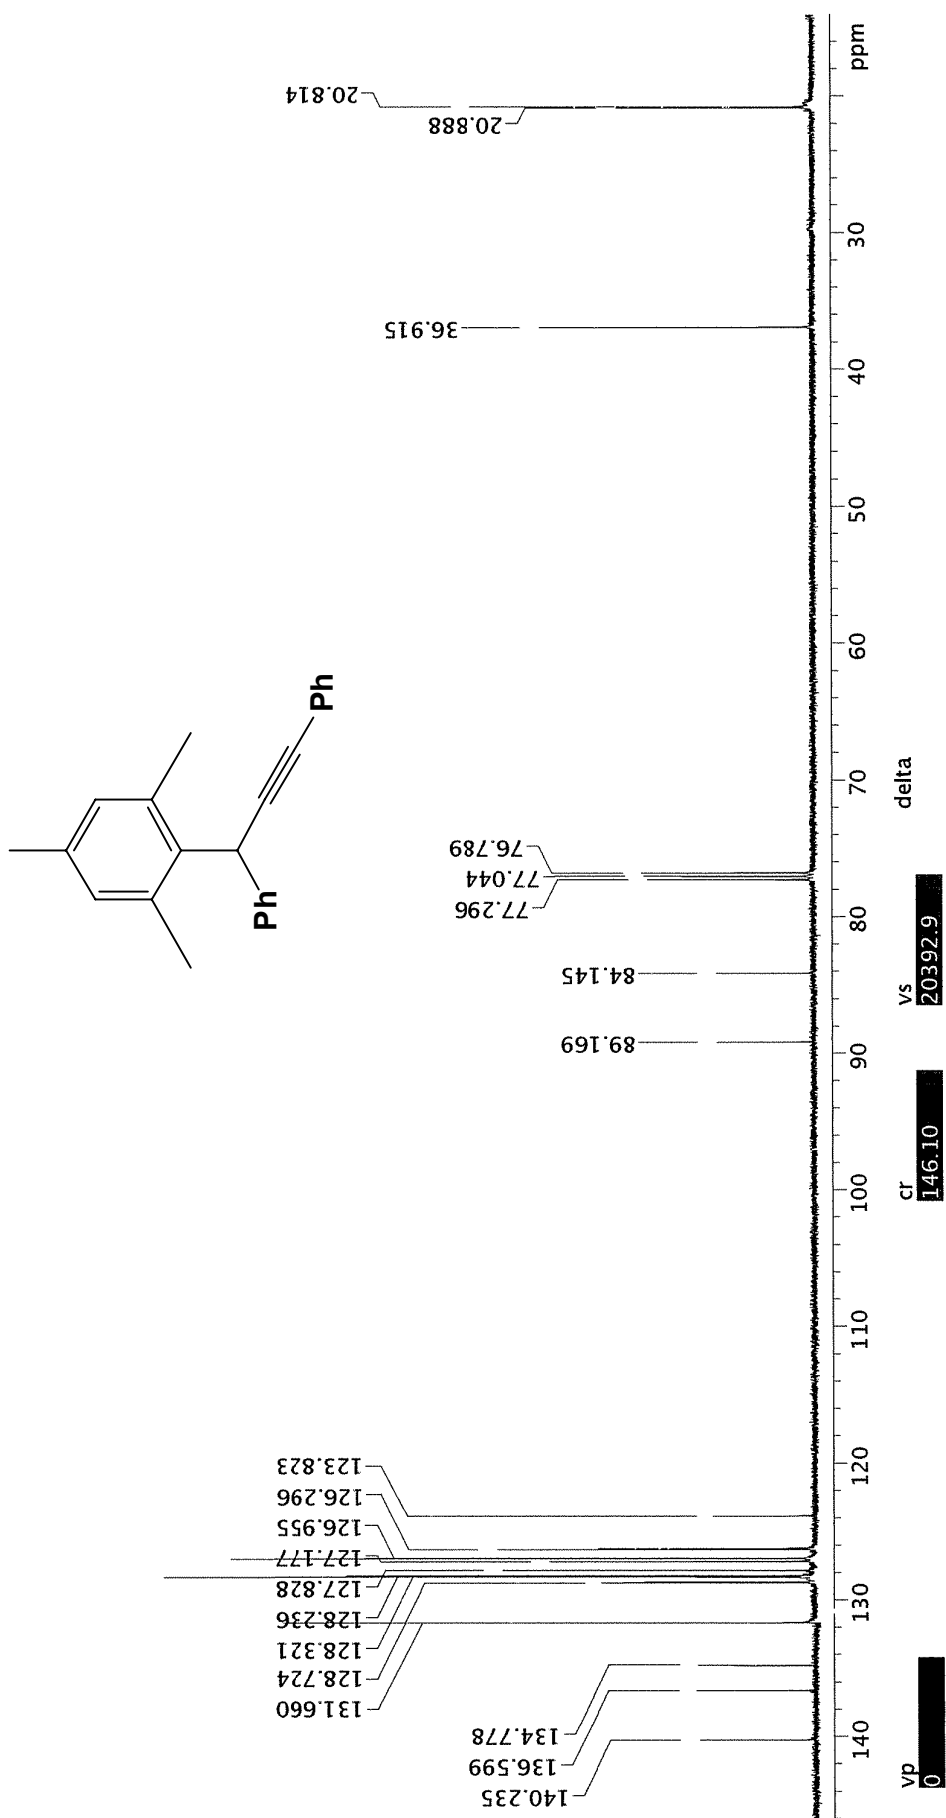

Figure 10.  $^{13}\text{C}$  NMR of compound 11

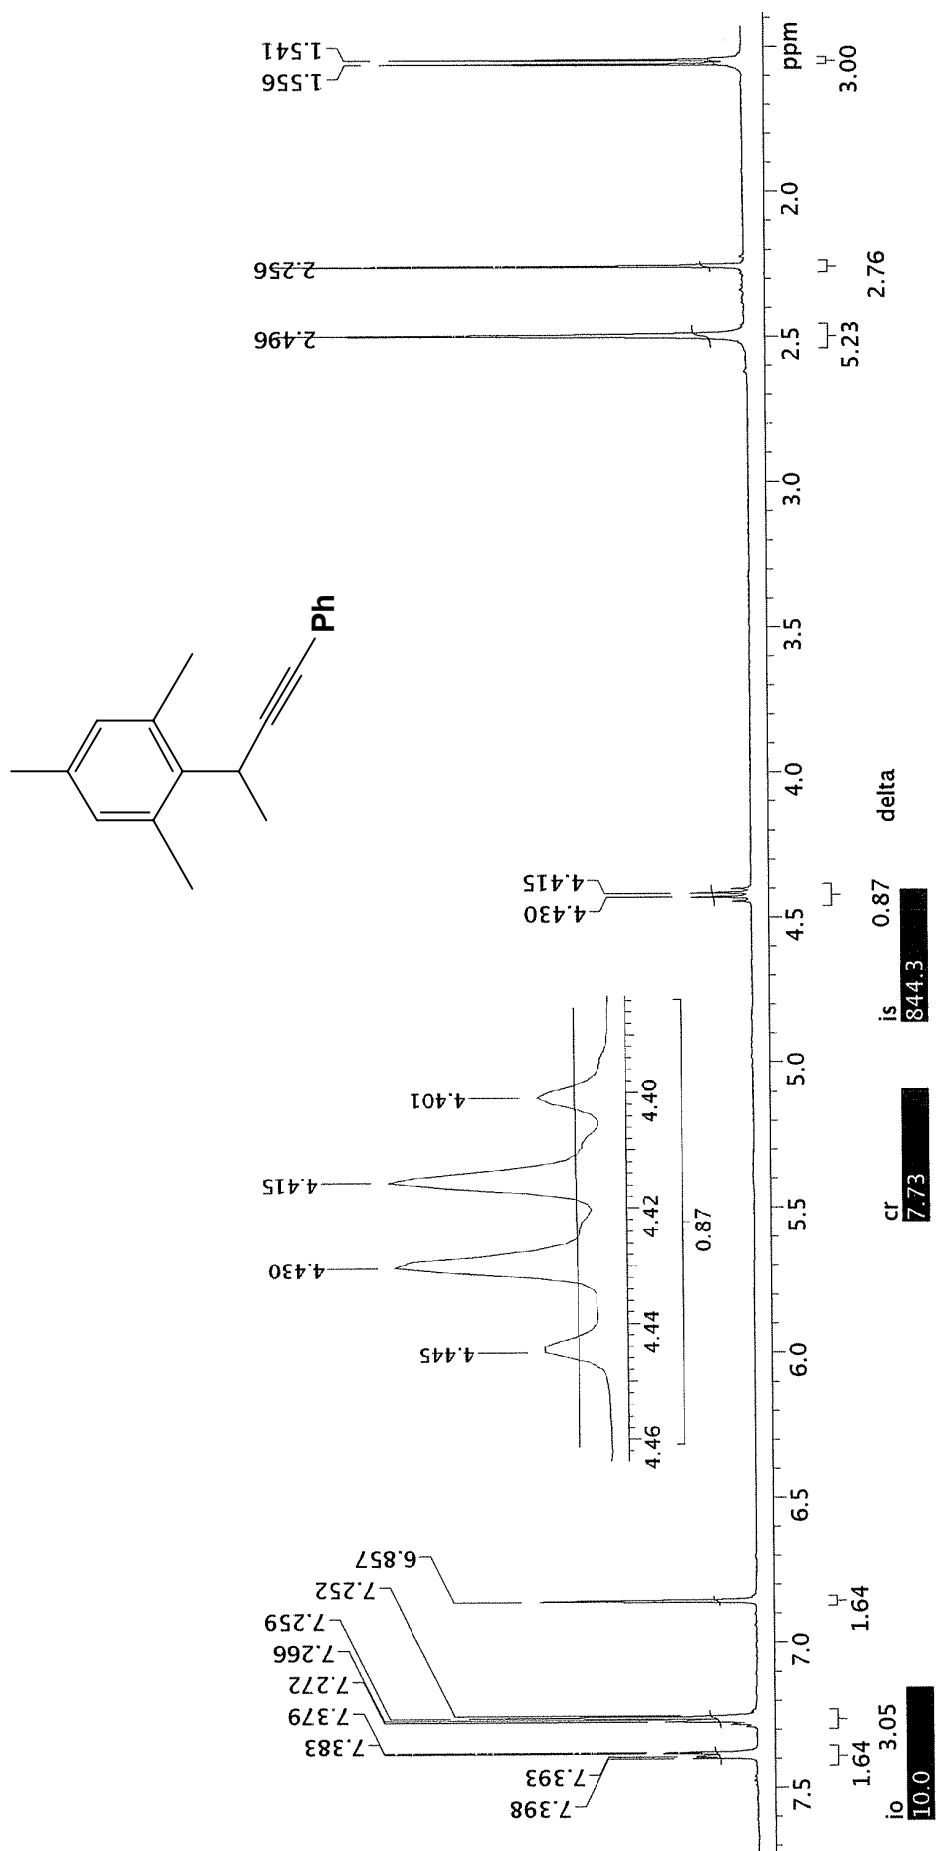

Figure 11. <sup>1</sup>H NMR of compound 12

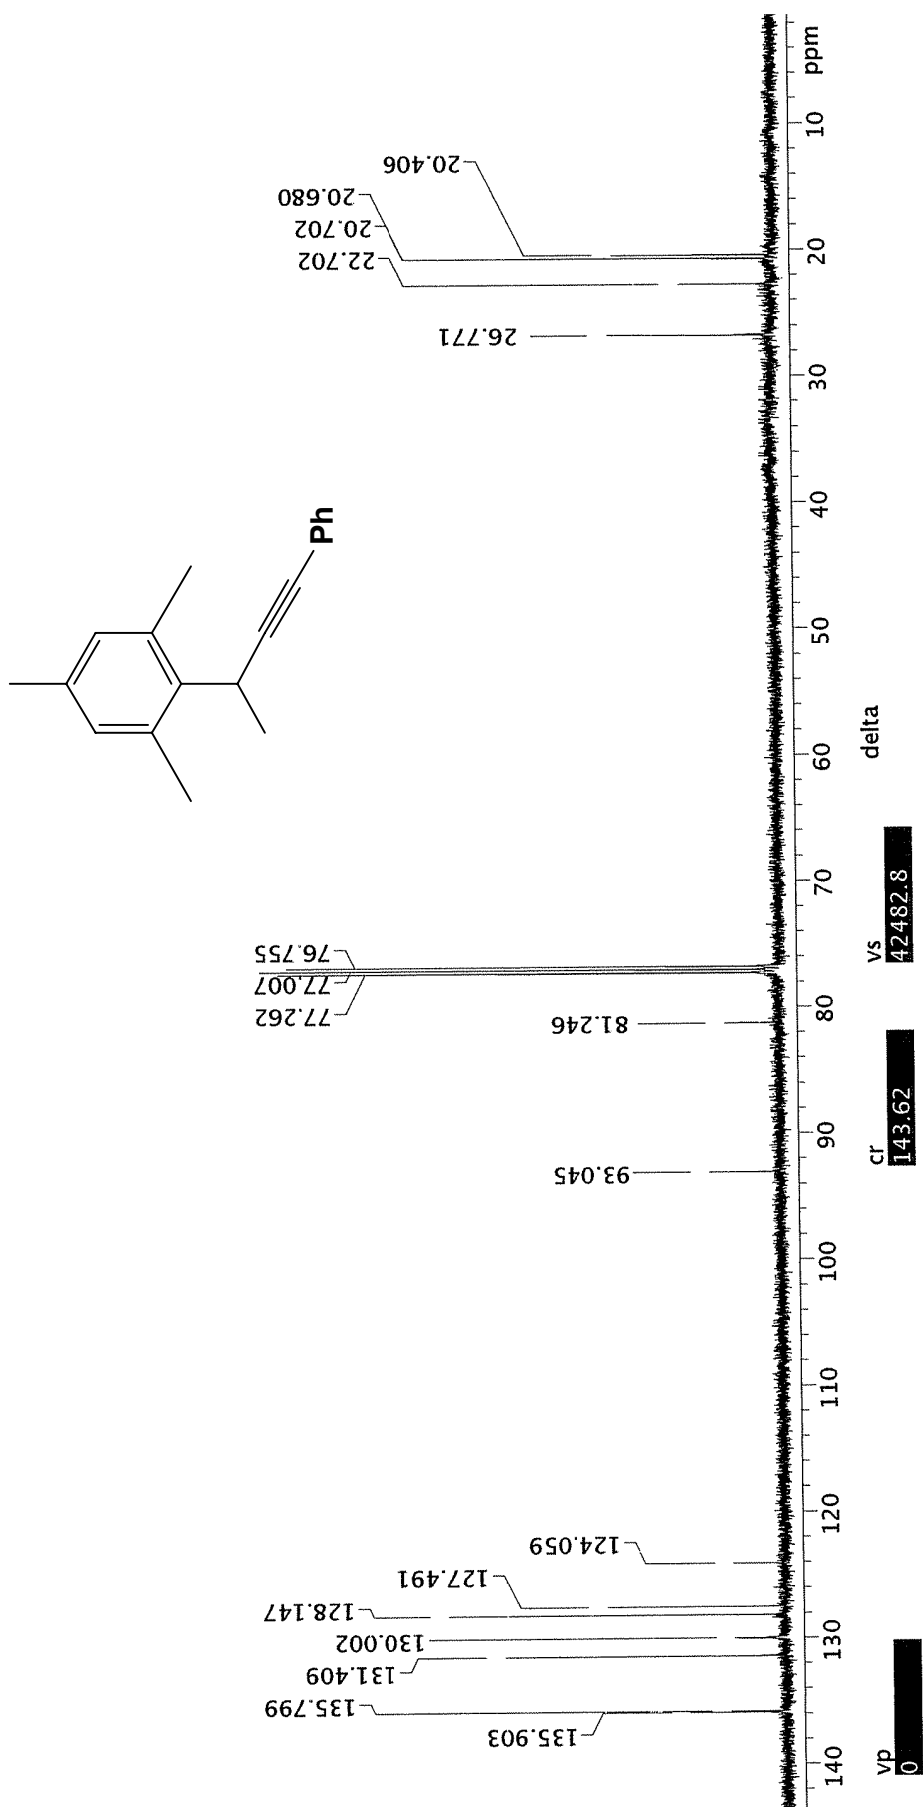

Figure 12.  $^{13}\text{C}$  NMR of compound 12

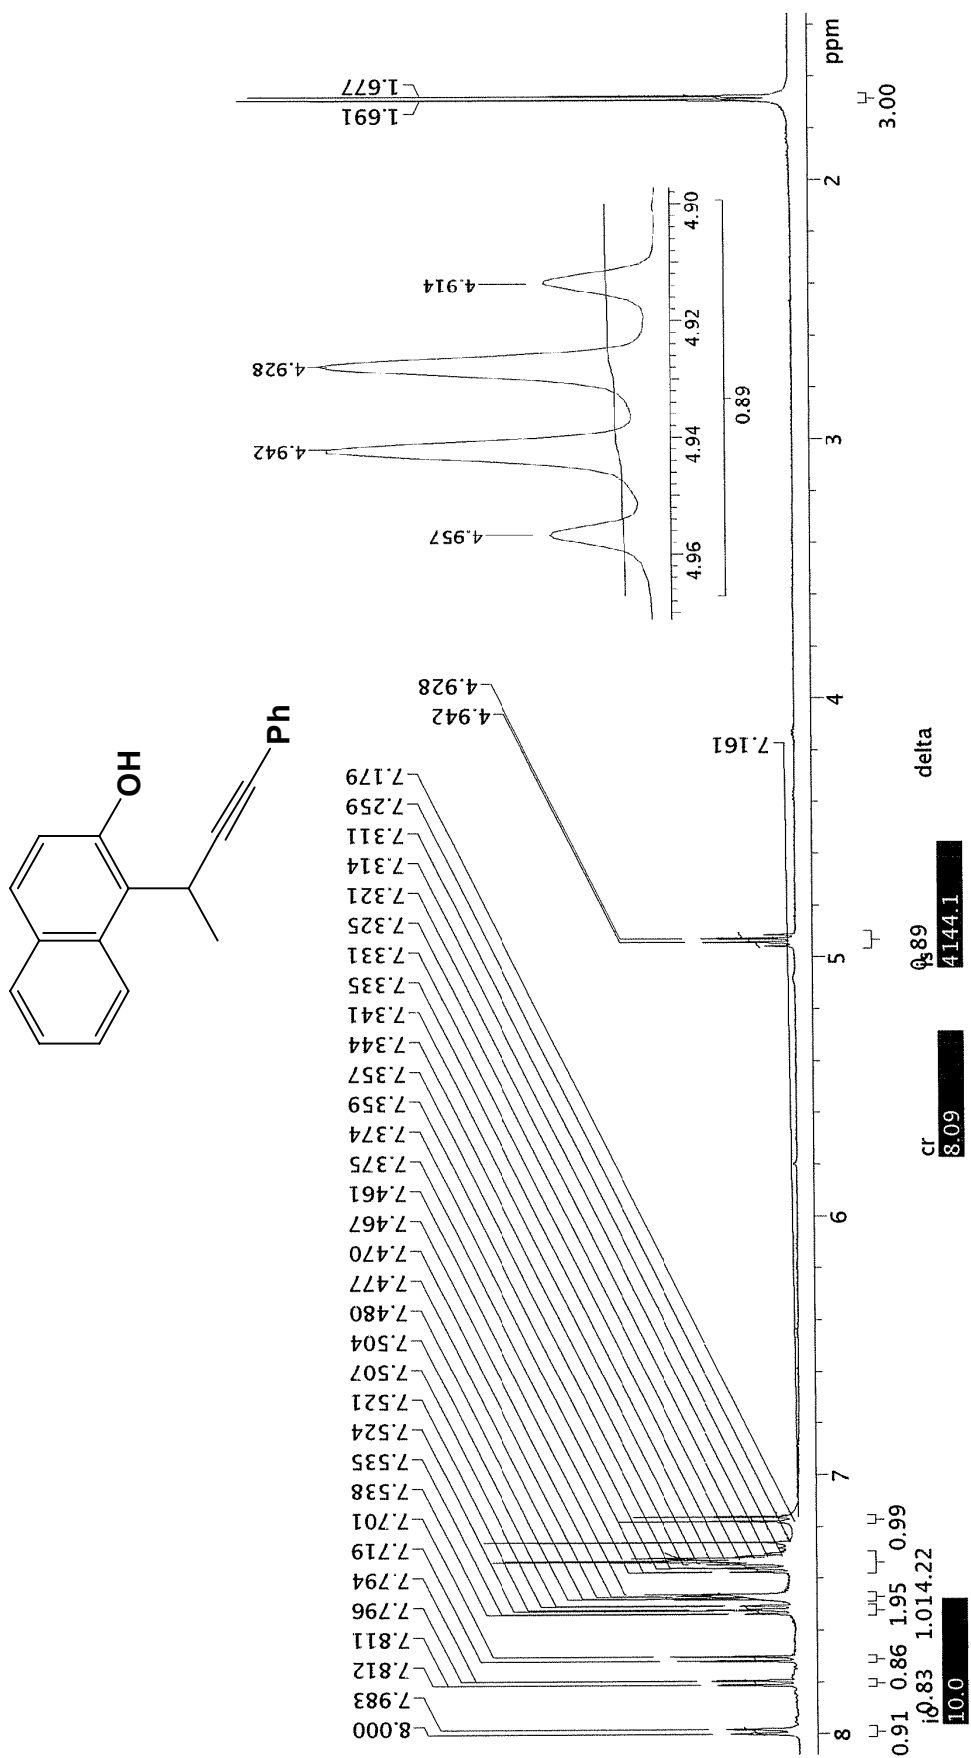

Figure 13. <sup>1</sup>H NMR of compound 16

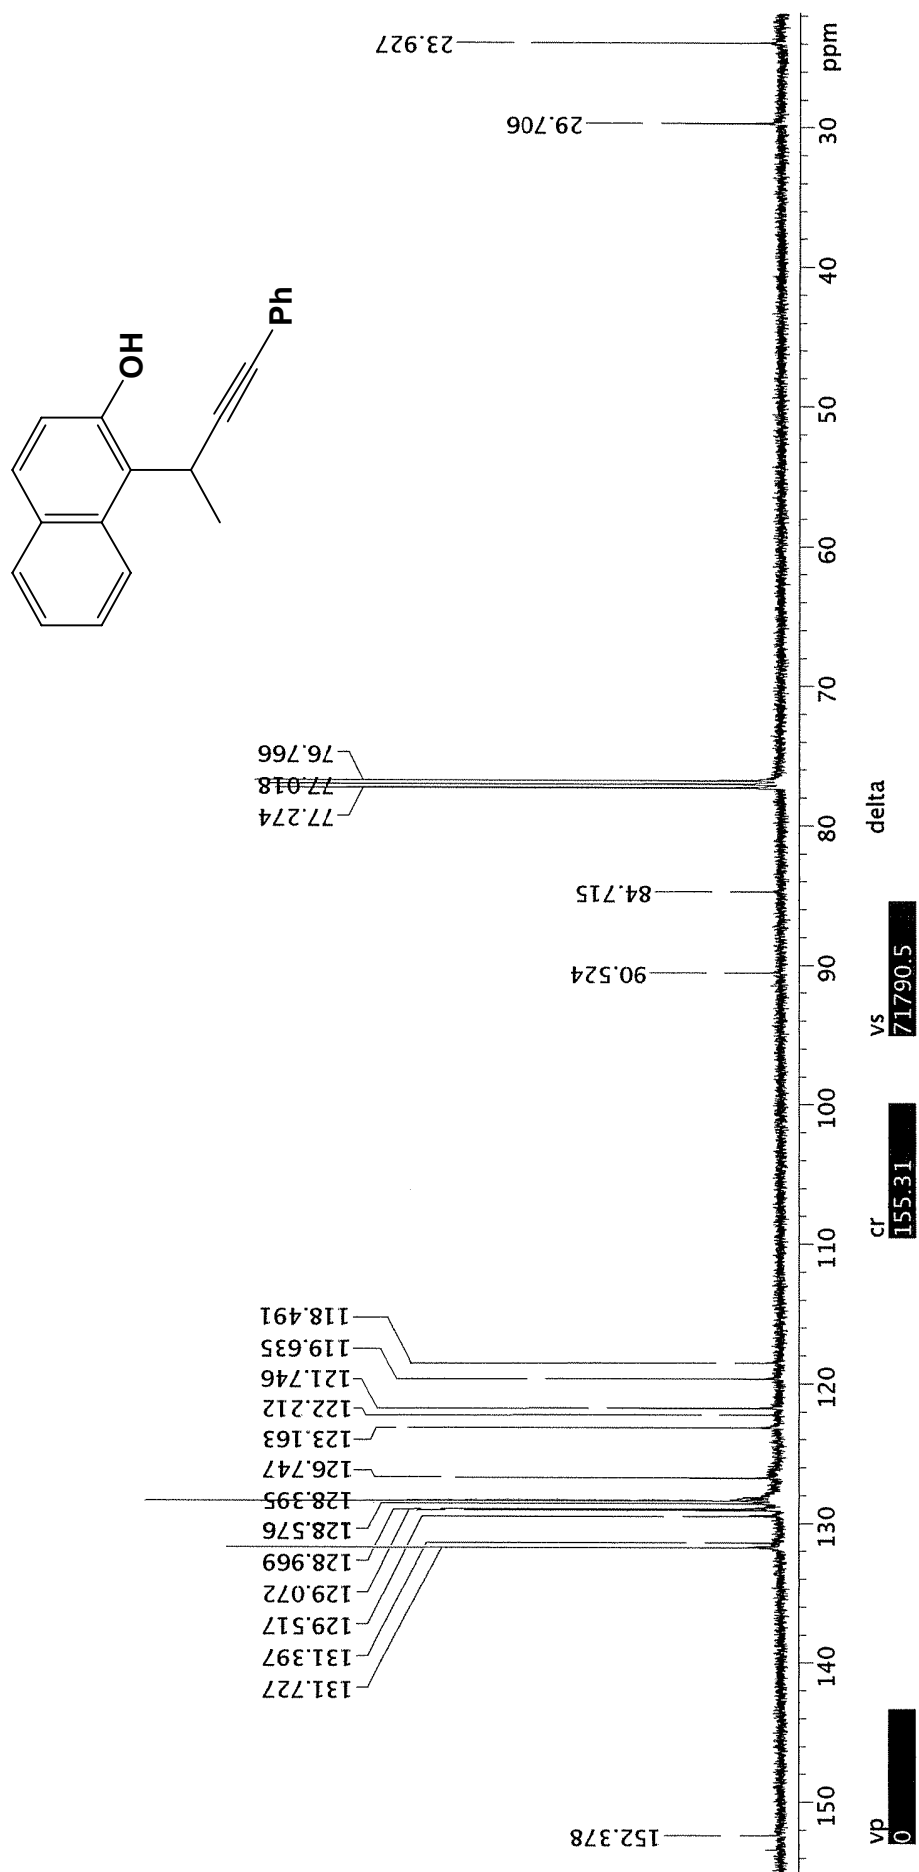

Figure 14.  $^{13}\text{C}$  NMR of compound 16

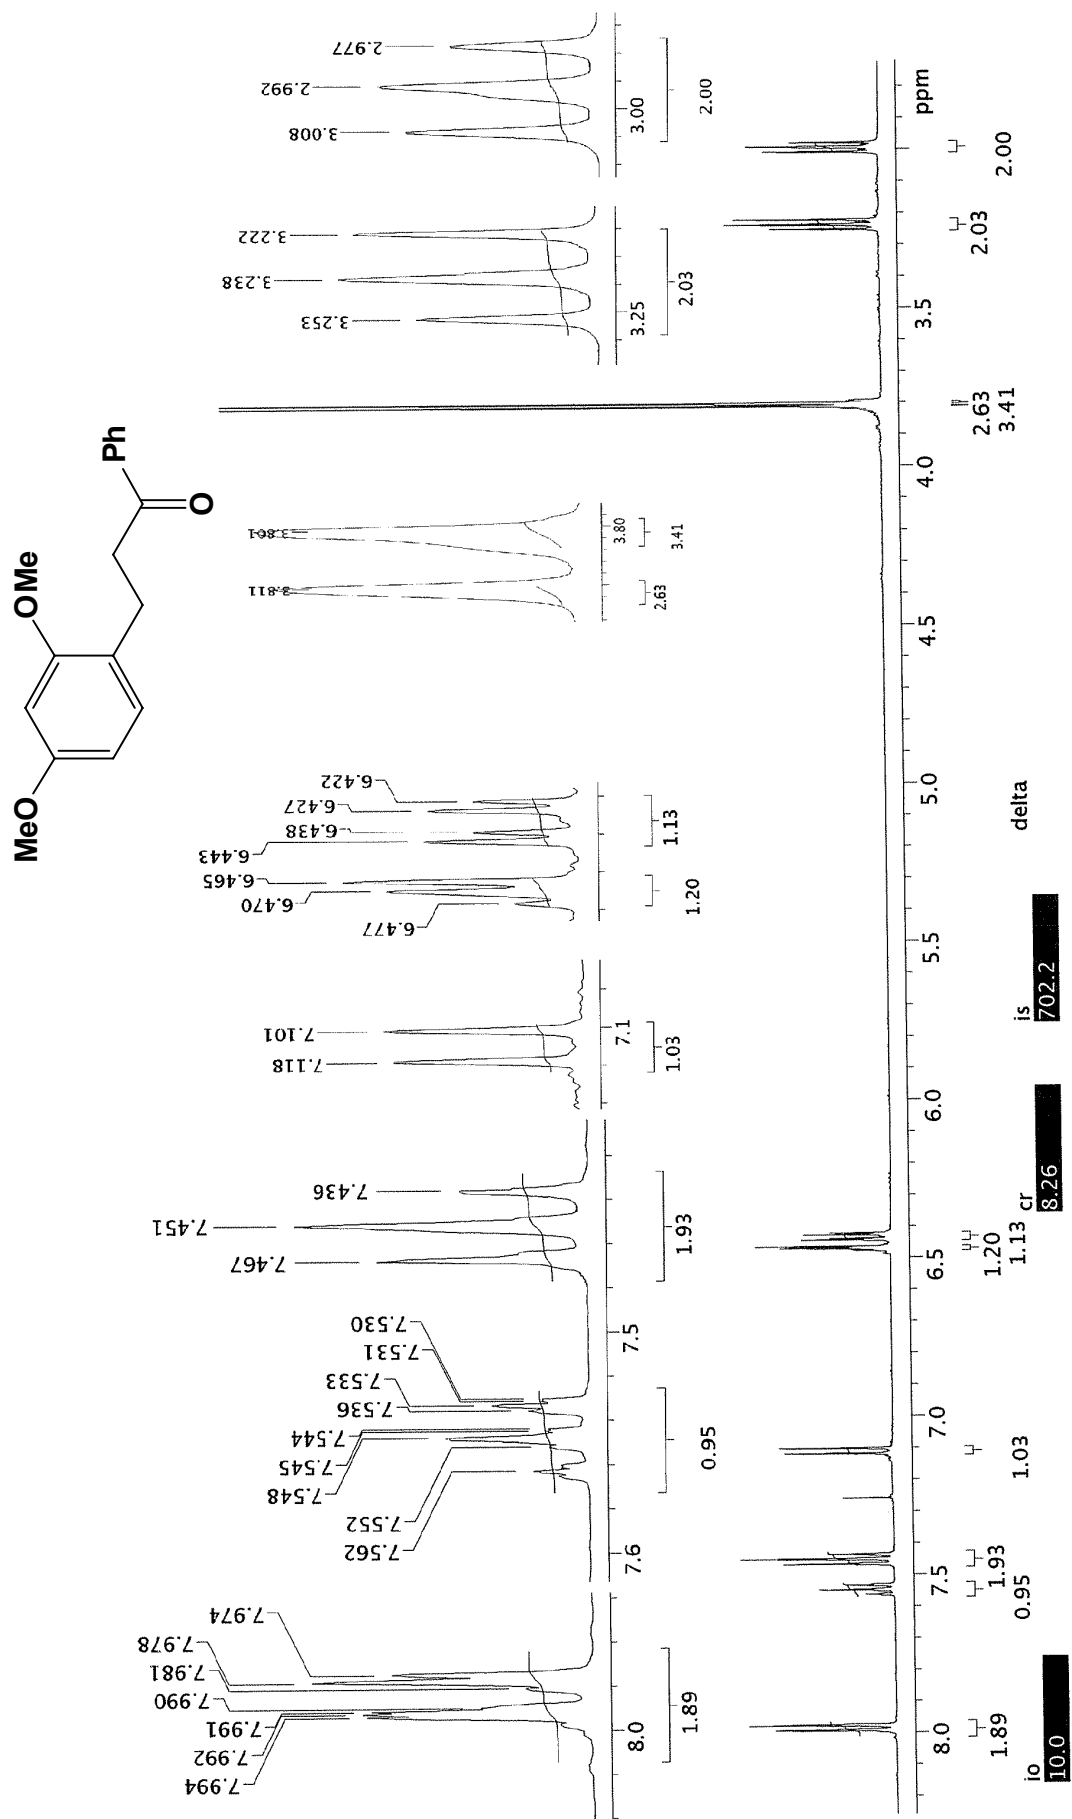

Figure 15. <sup>1</sup>H NMR of compound 23



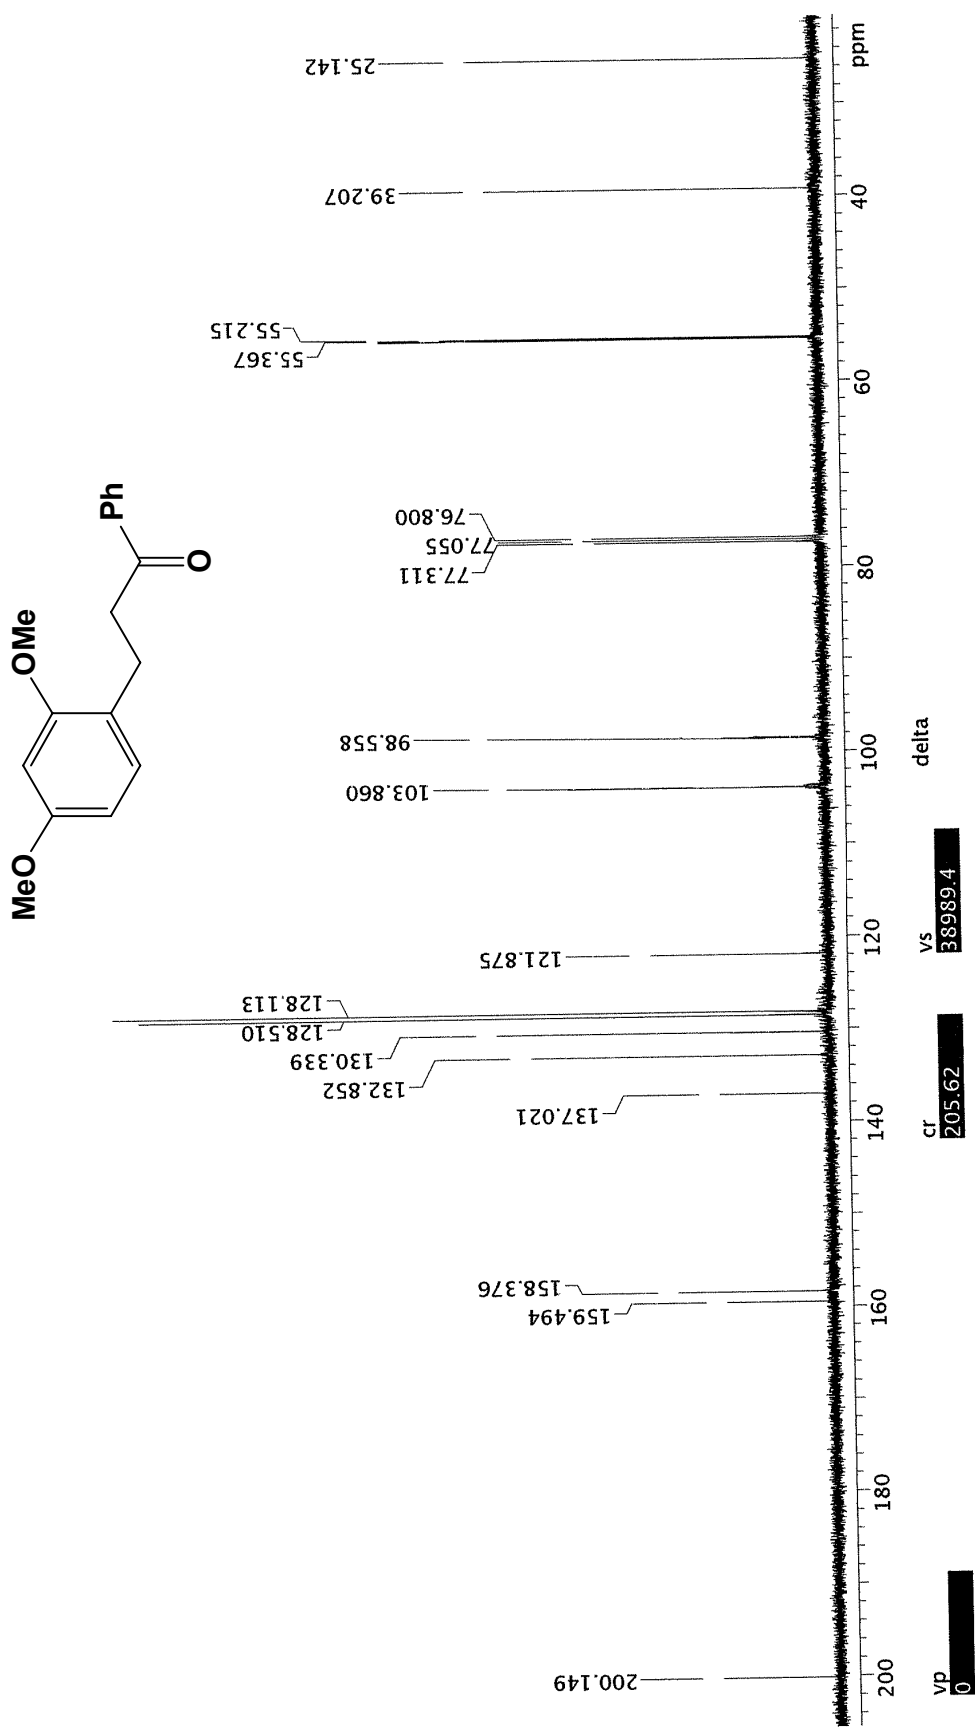

Figure 16.  $^{13}\text{C}$  NMR of compound 23

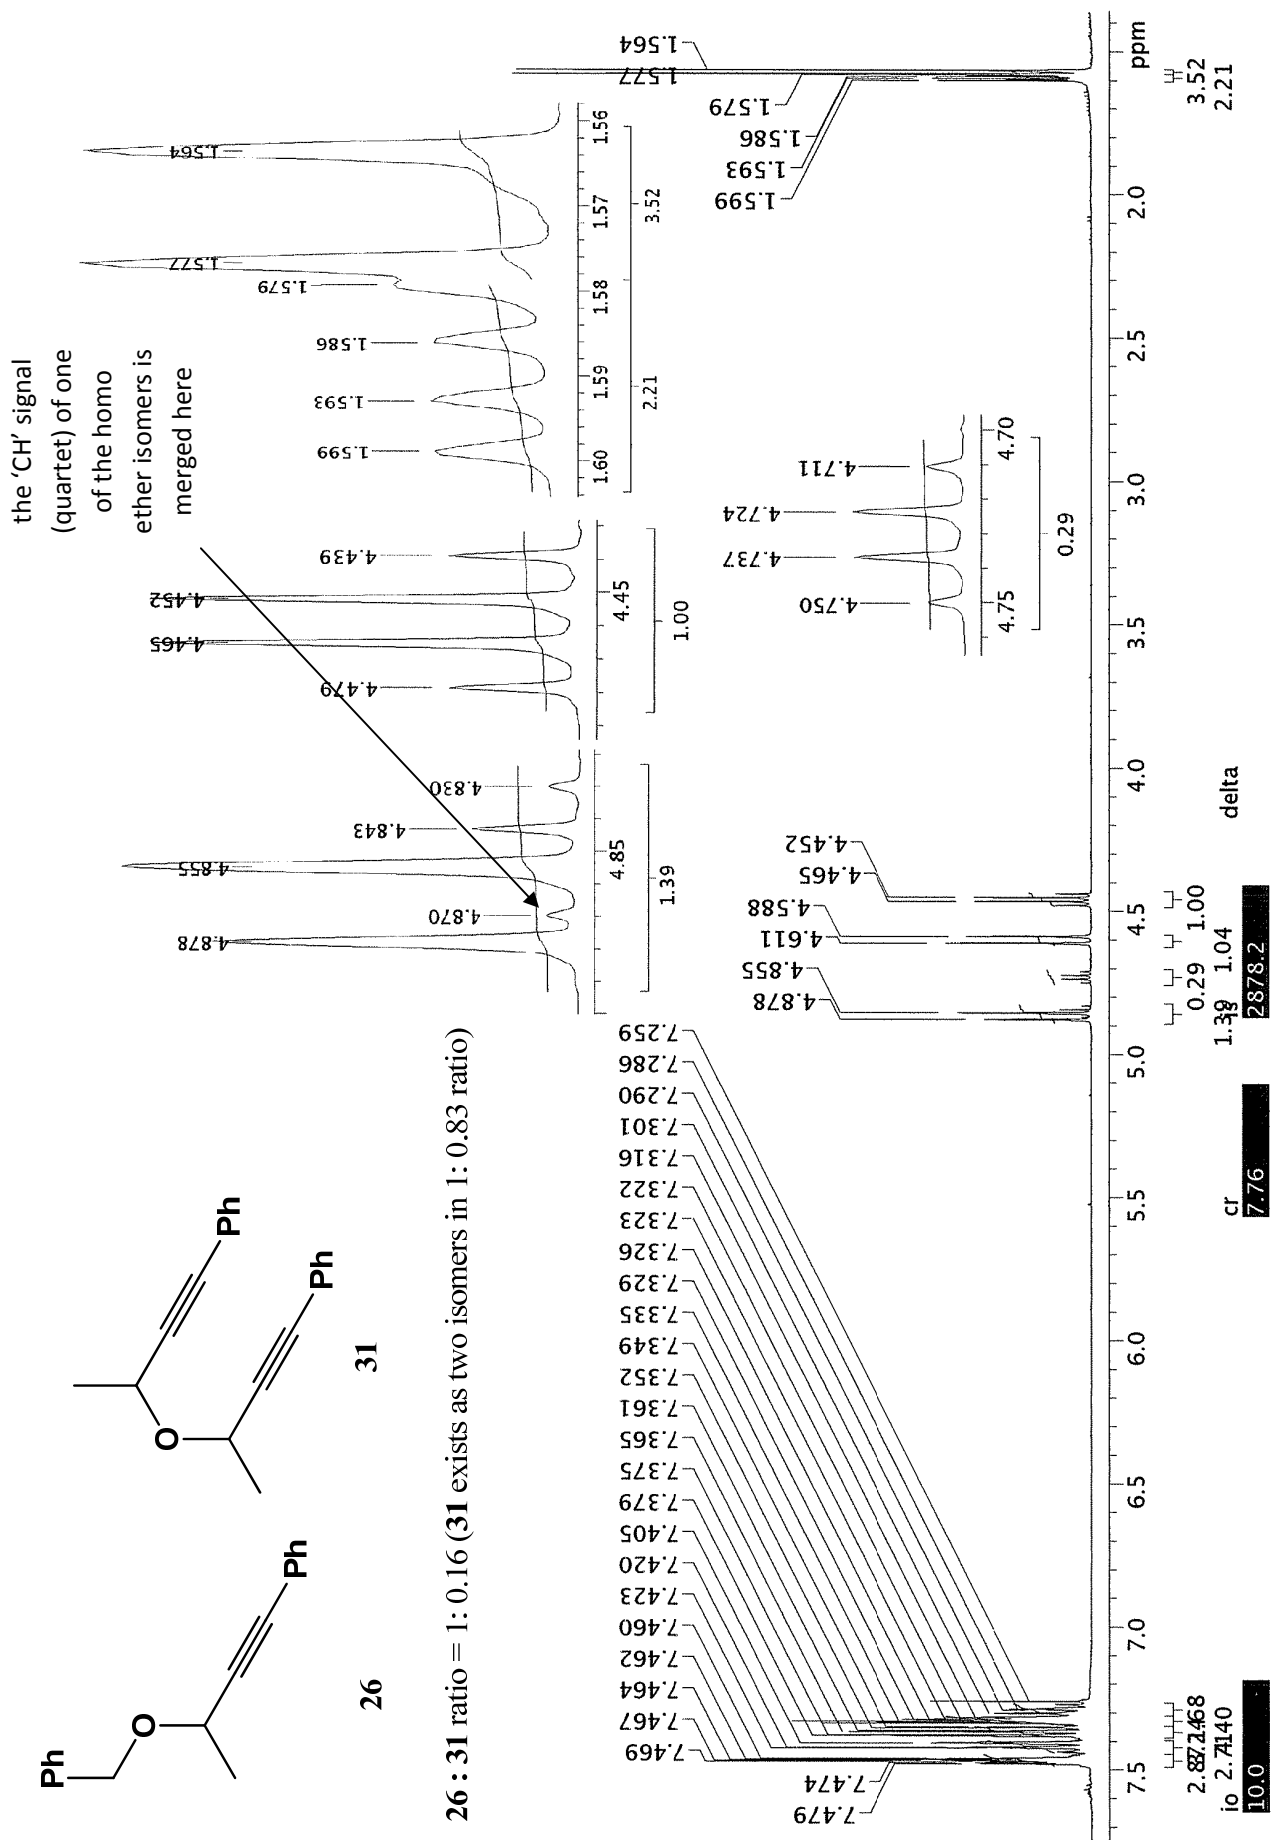

Figure 17. <sup>1</sup>H NMR of compound 26

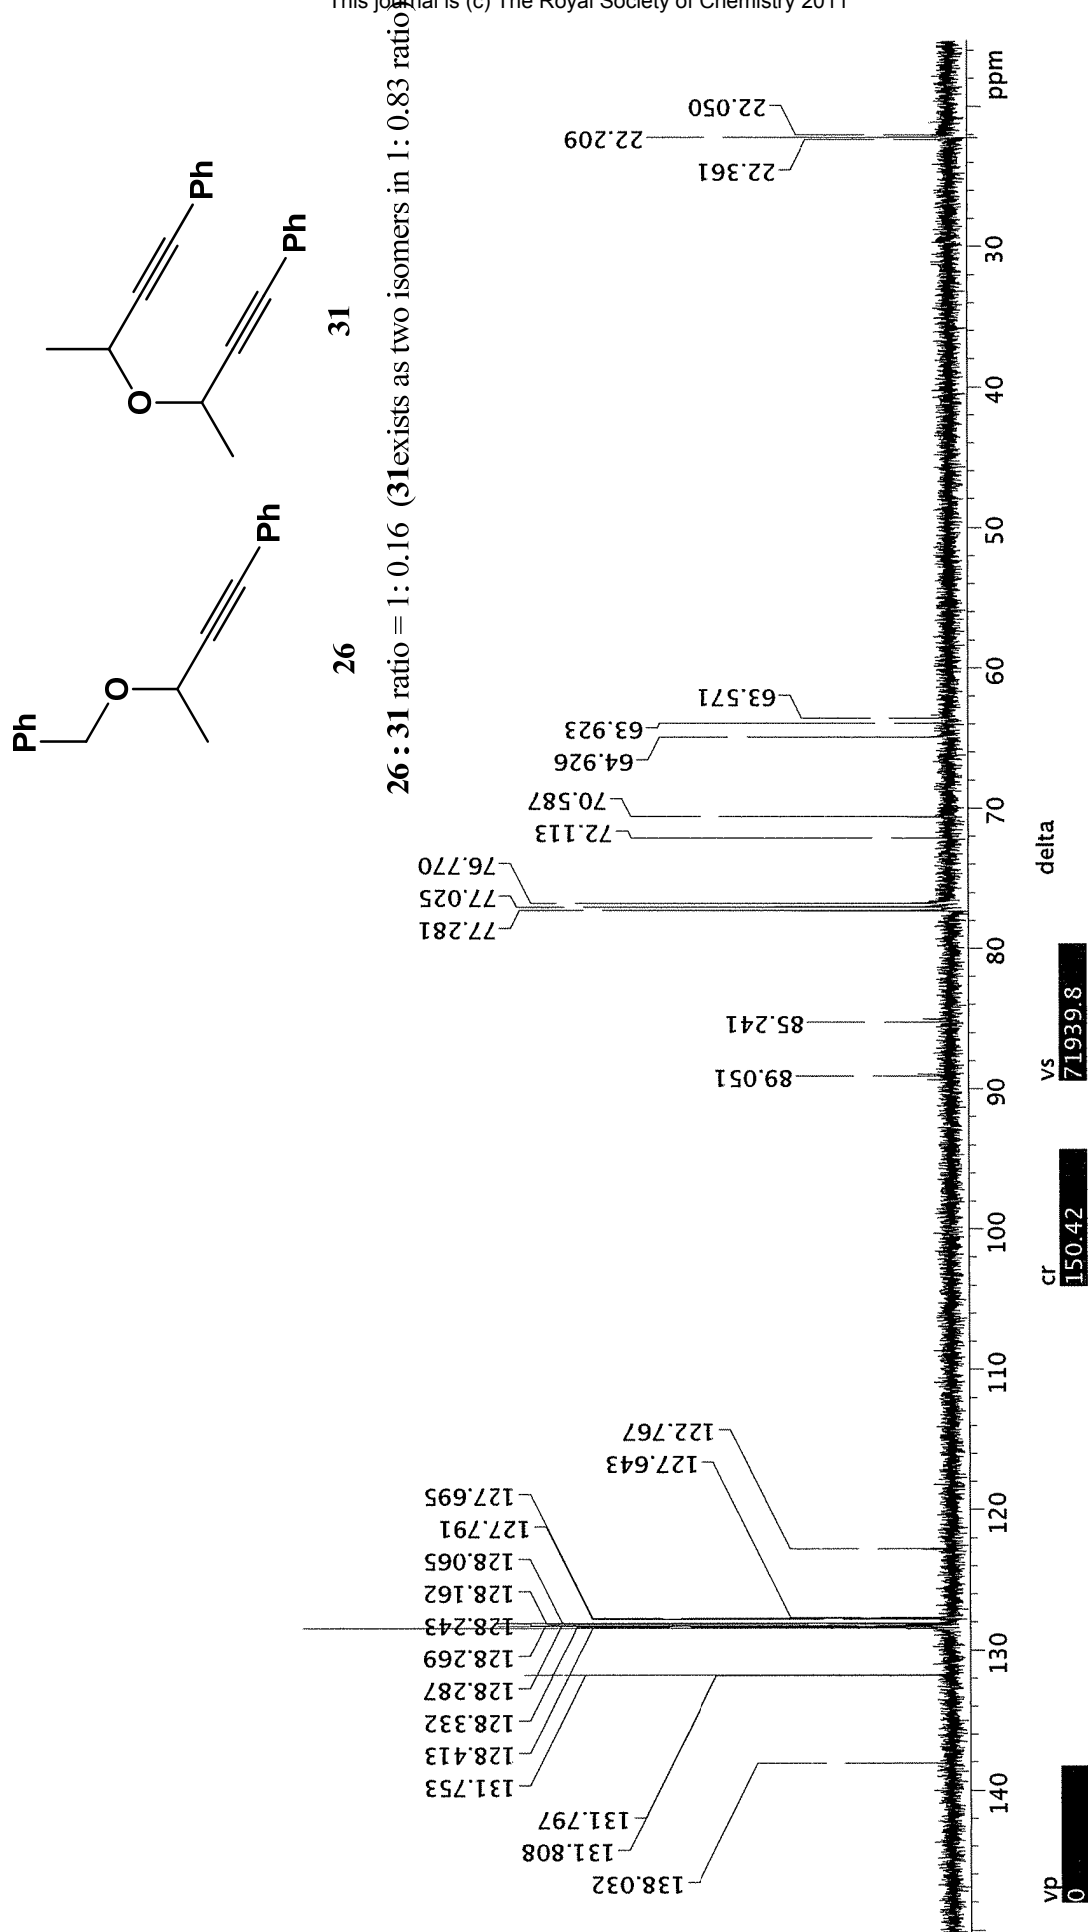

Figure 18. <sup>13</sup>C NMR of compound 26

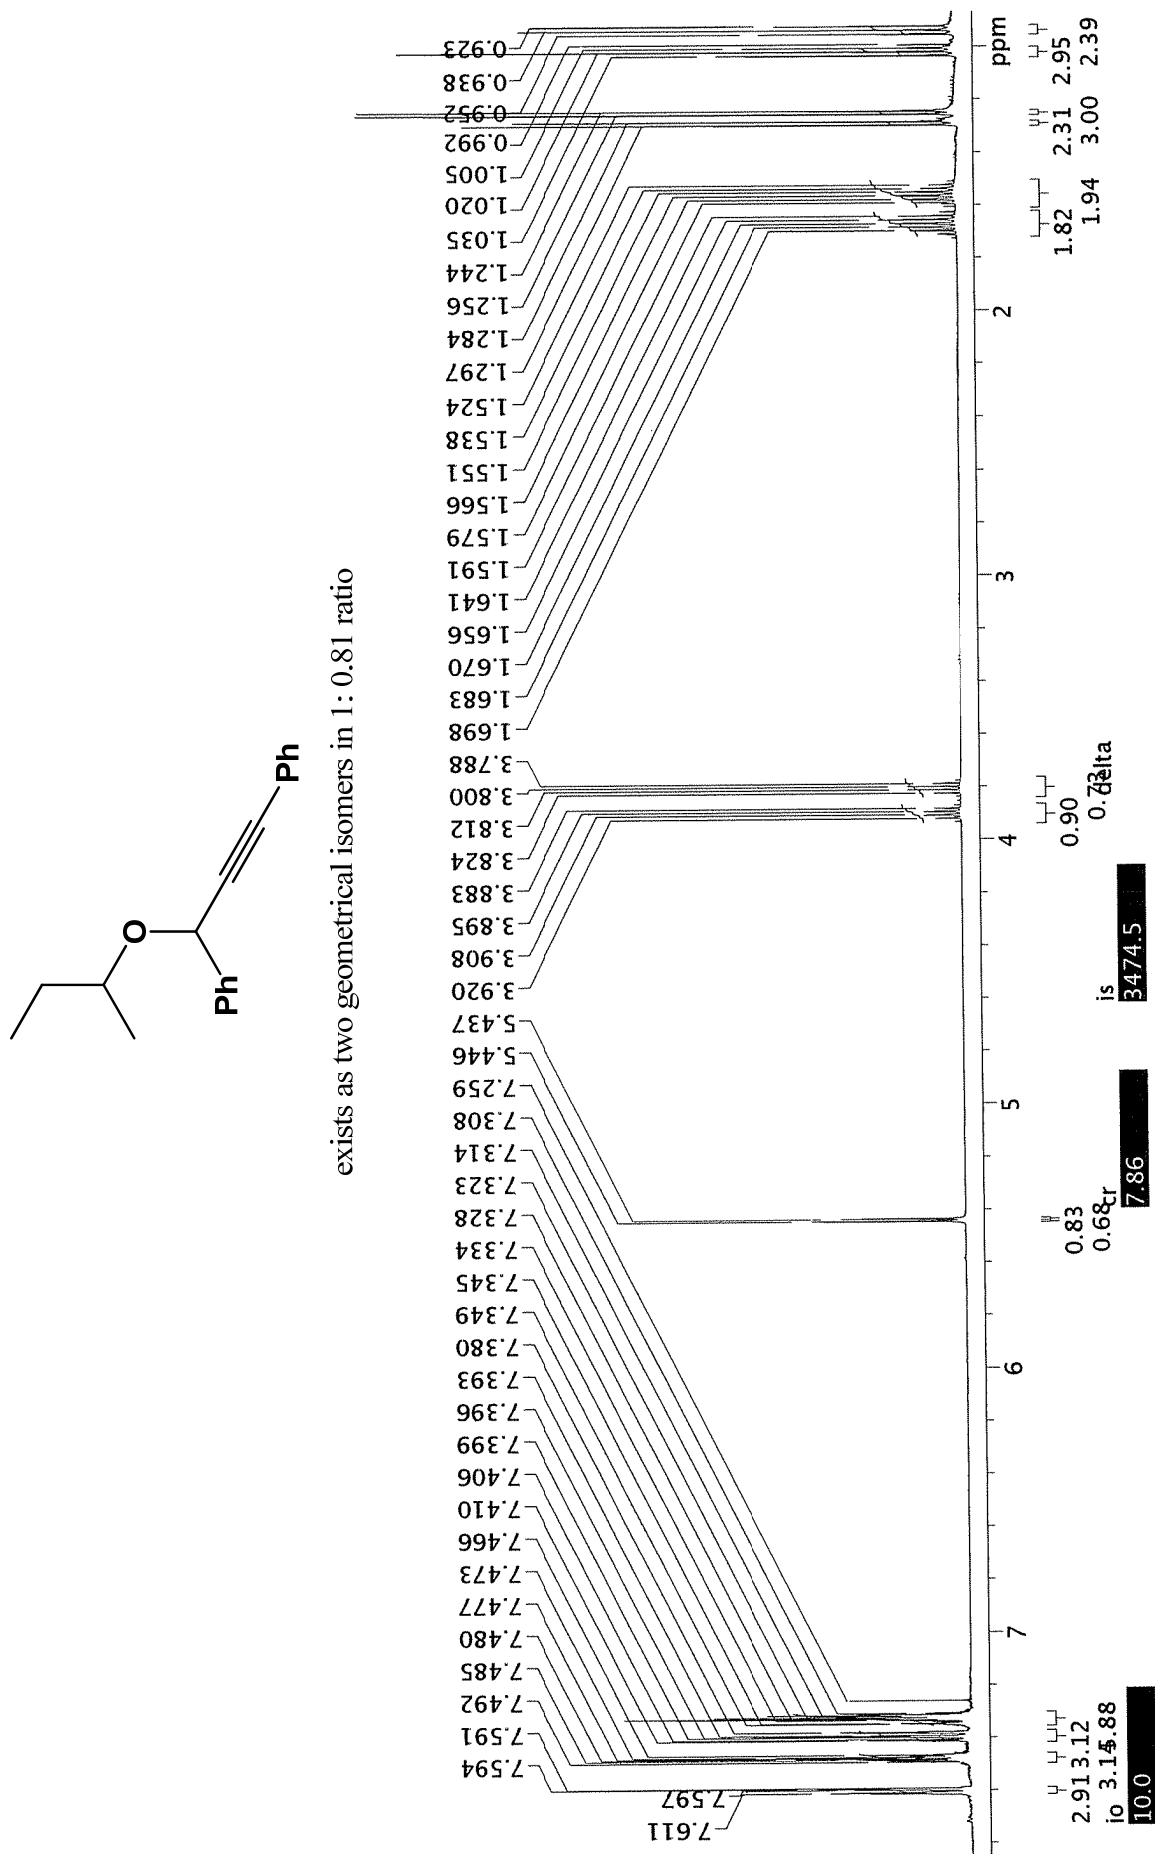

Figure 19. <sup>1</sup>H NMR of compound 29

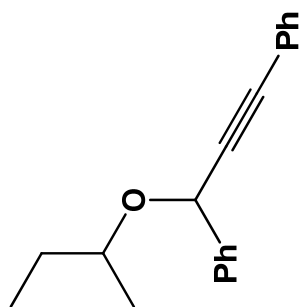

exists as two geometrical isomers in 1:0.81 ratio

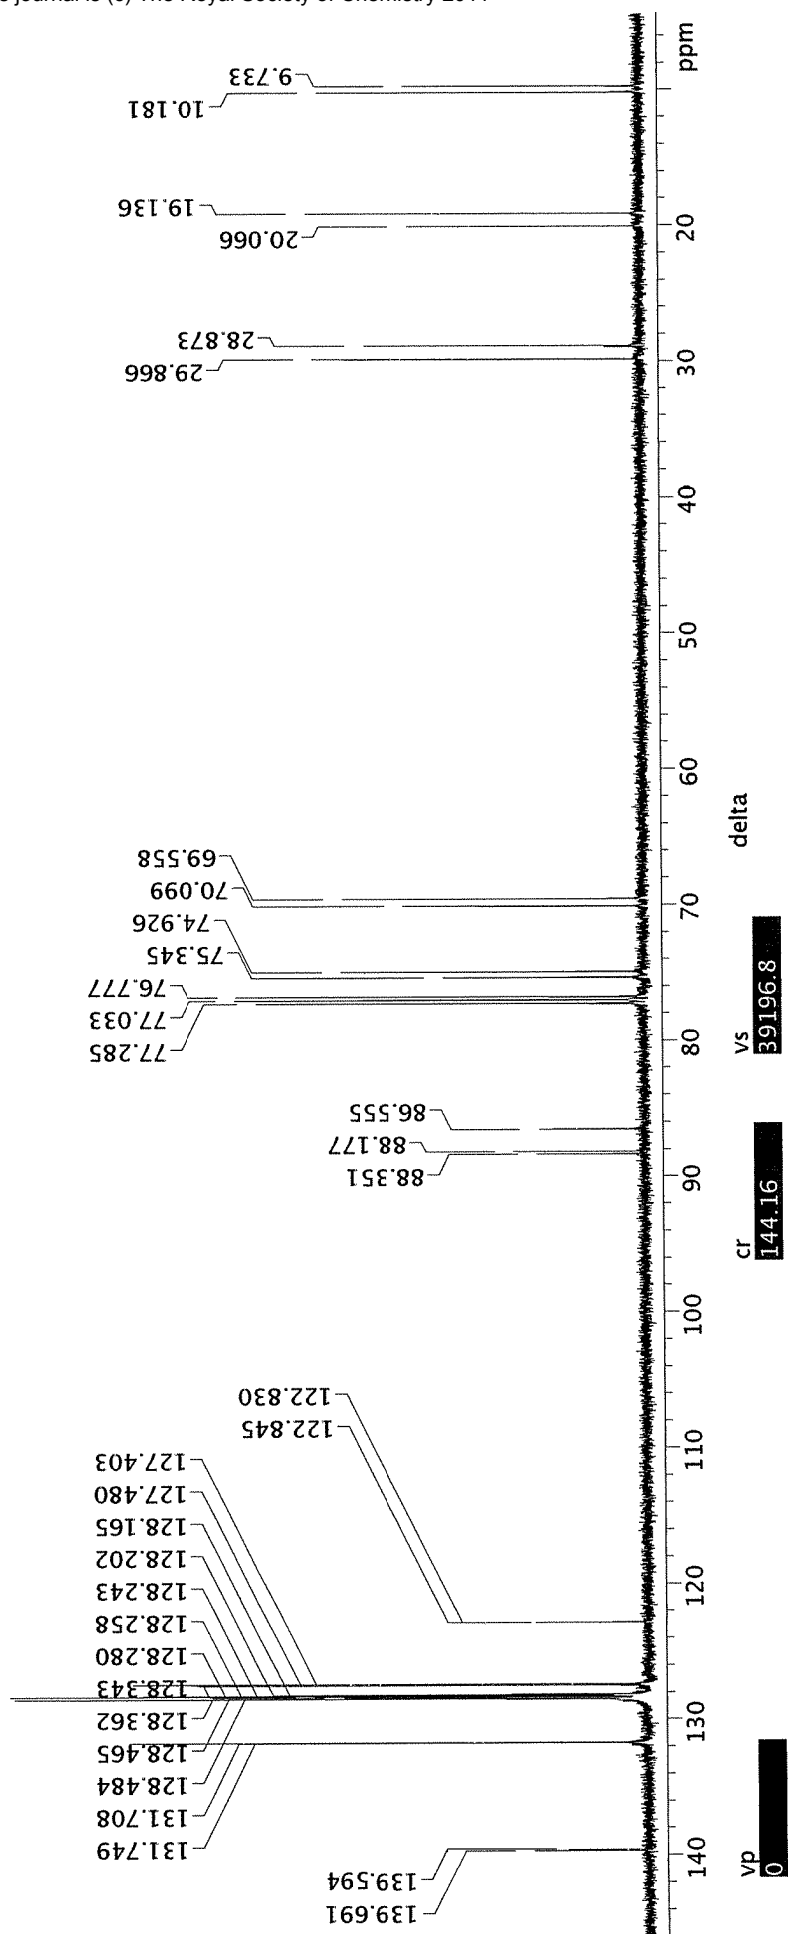

Figure 20. <sup>13</sup>C NMR of compound 29

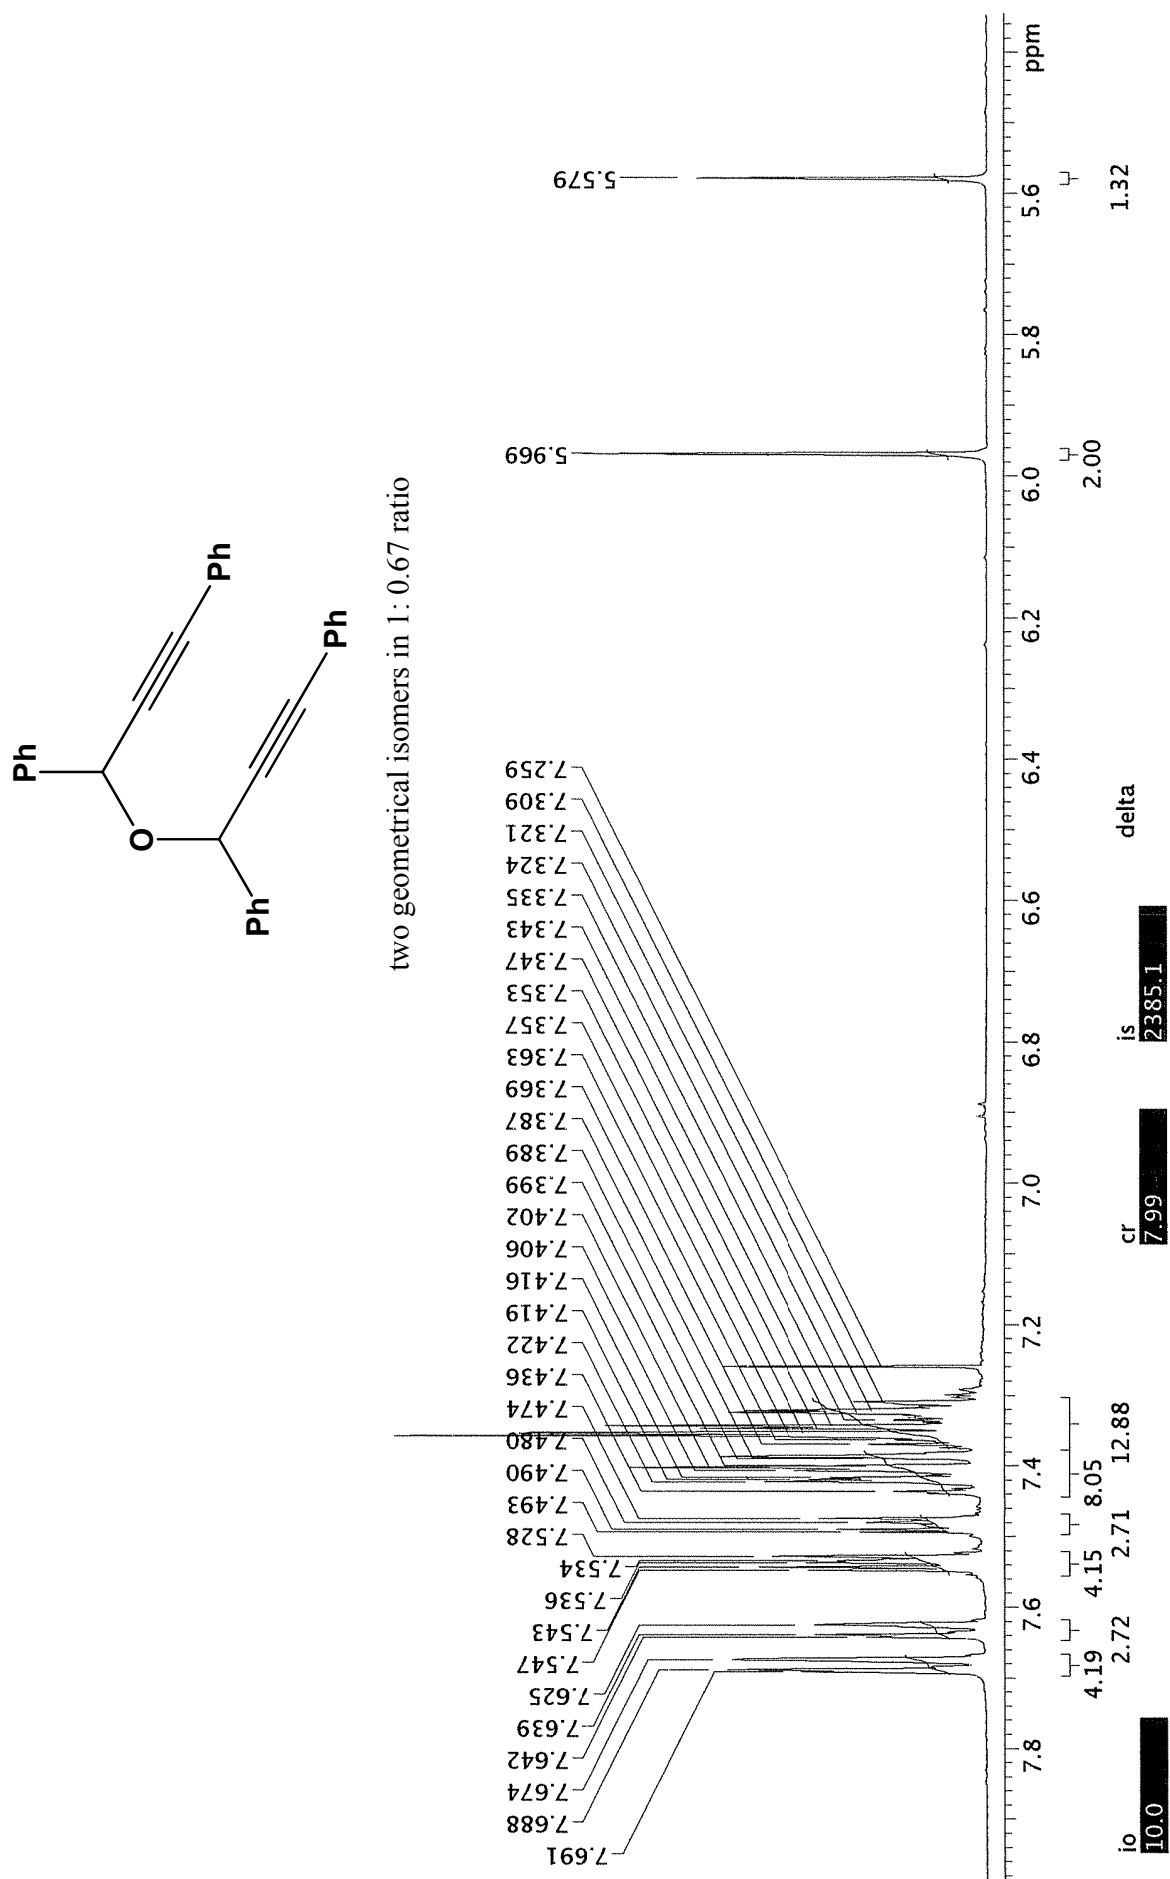

Figure 21.  $^1\text{H}$  NMR of compound 30

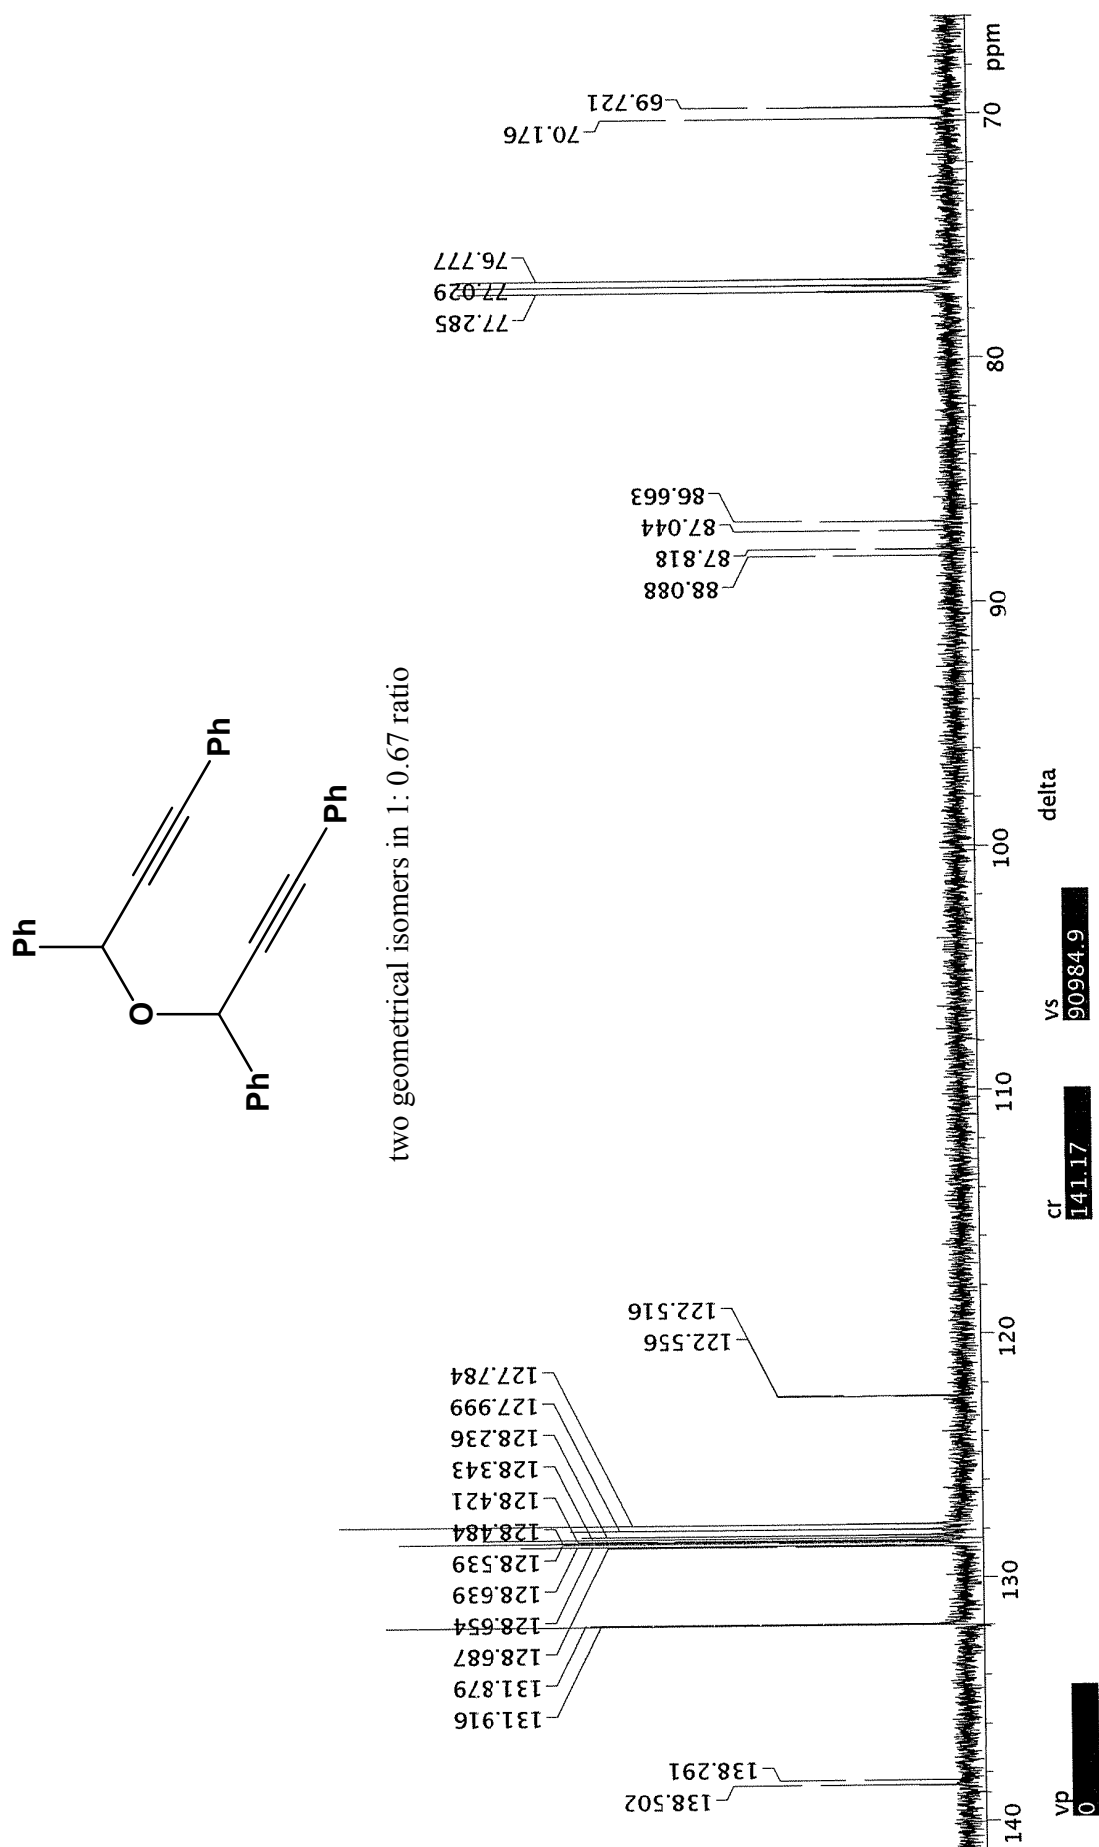

Figure 22.  $^{13}\text{C}$  NMR of compound 30

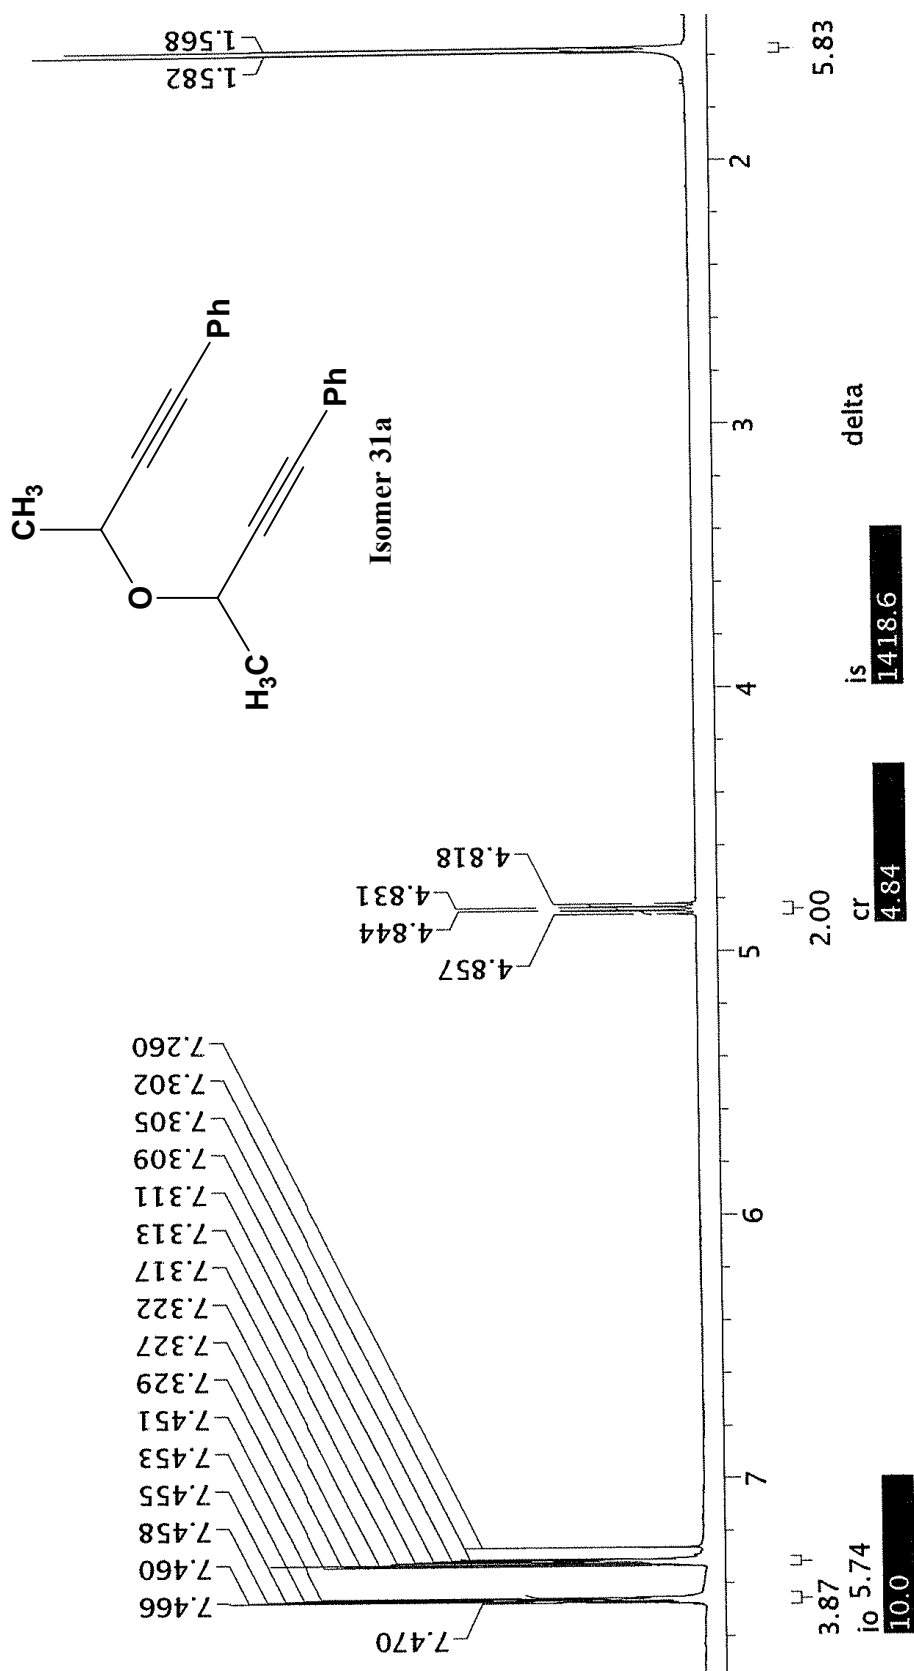

Figure 23. <sup>1</sup>H NMR of compound 31a



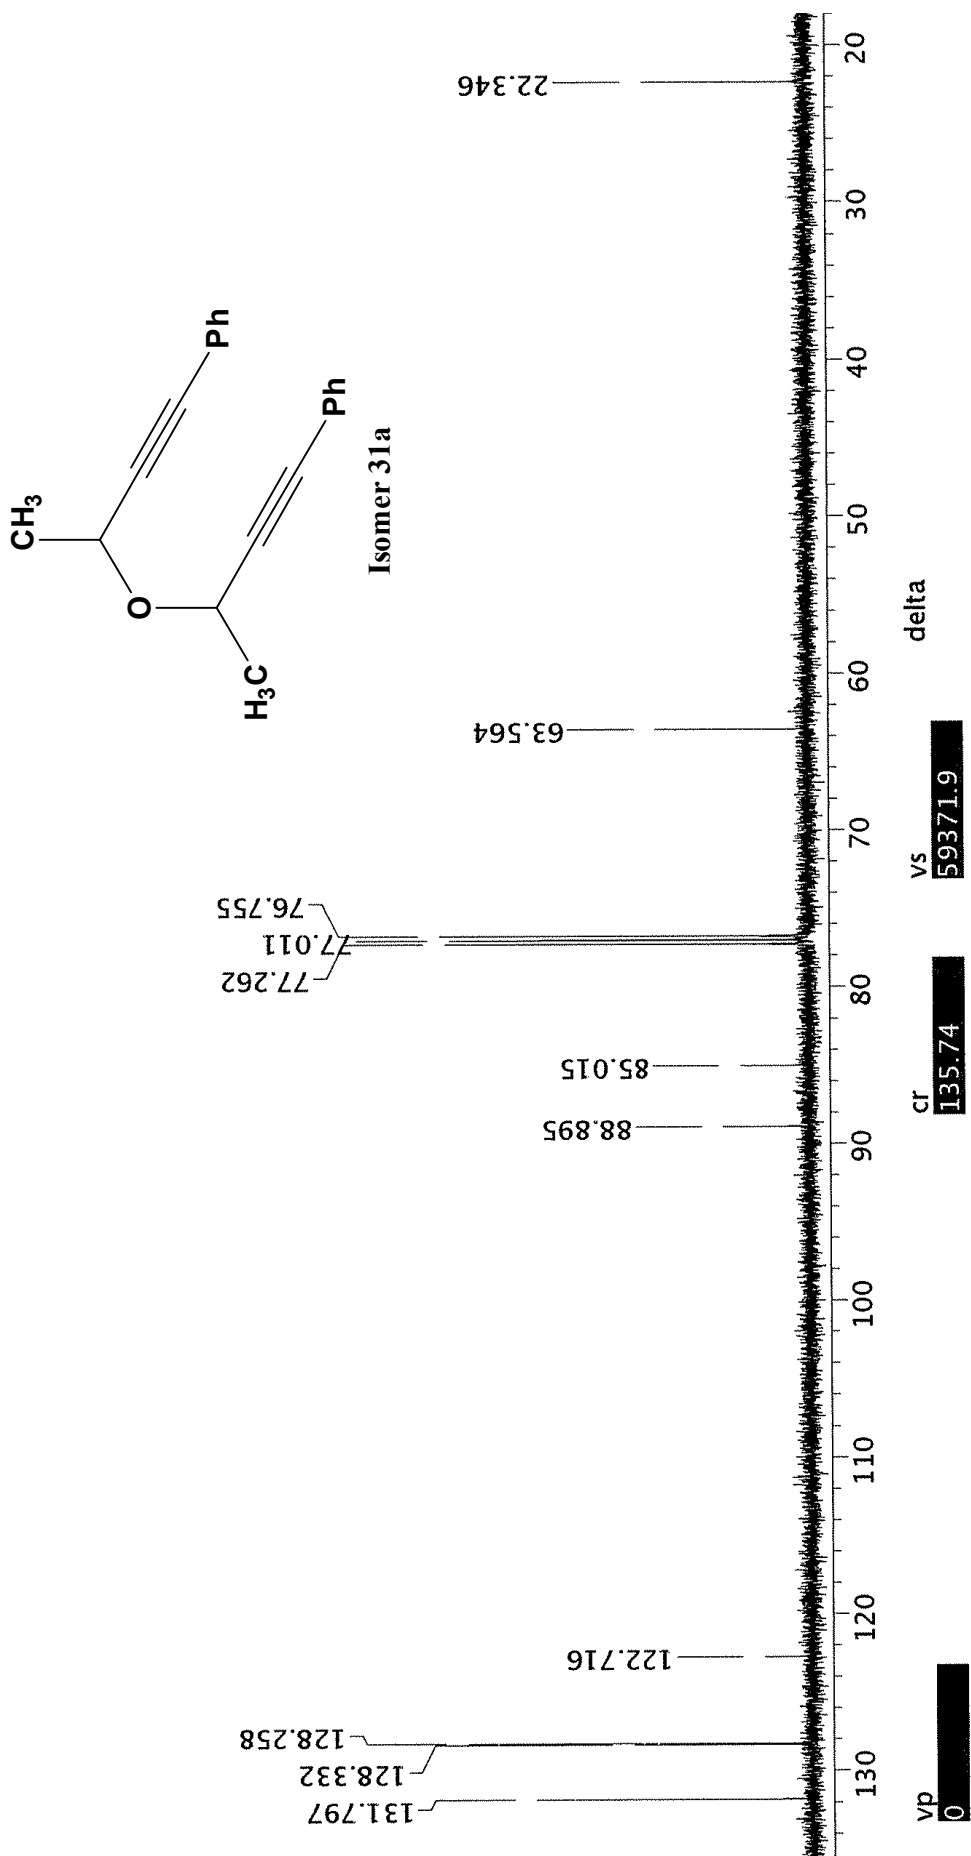

Figure 24.  $^{13}\text{C}$  NMR of compound 31a

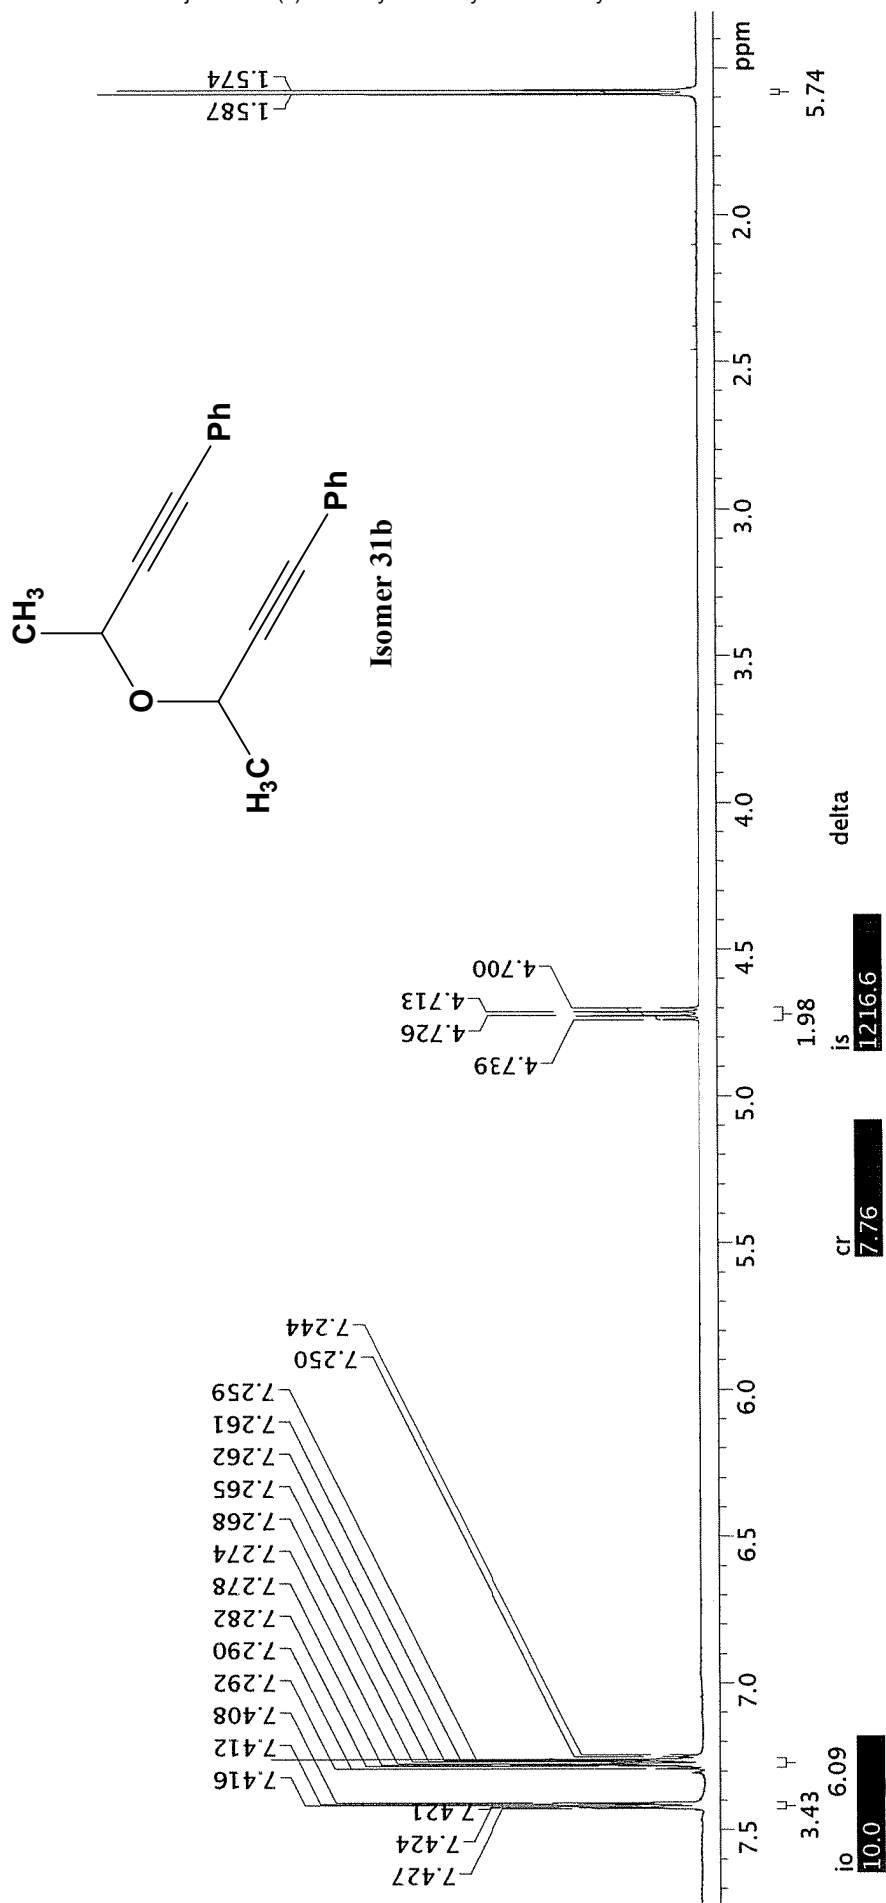

Figure 25.  $^1\text{H}$  NMR of compound 31b

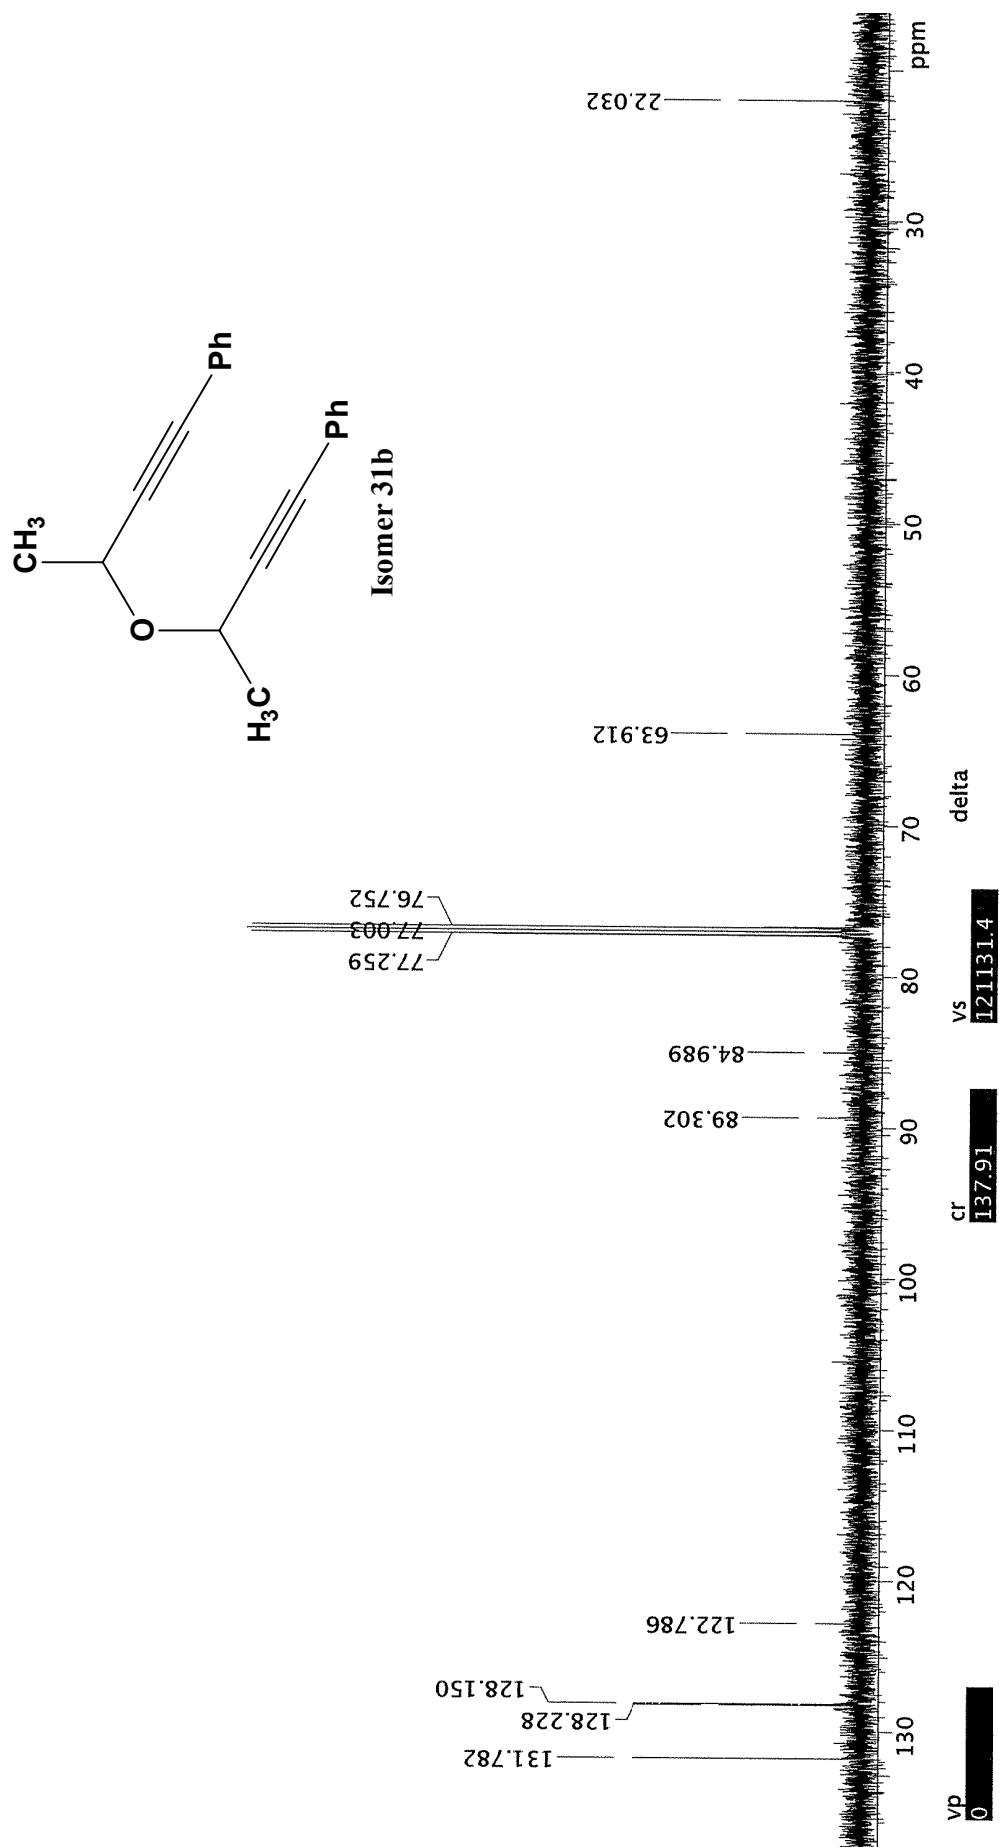

**Figure 26.**  $^{13}\text{C}$  NMR of compound 31b

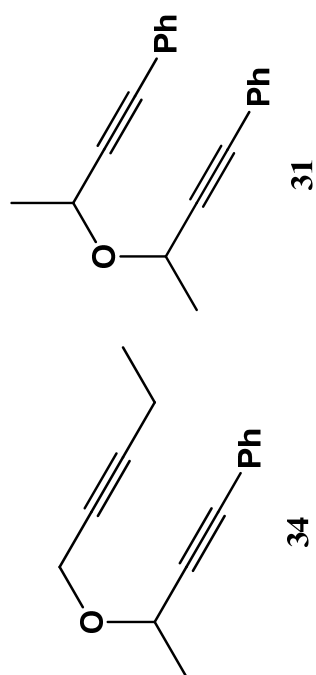

34: 31 ratio = 1: 0.31 (31 exists as two isomers in 1: 0.81 ratio)

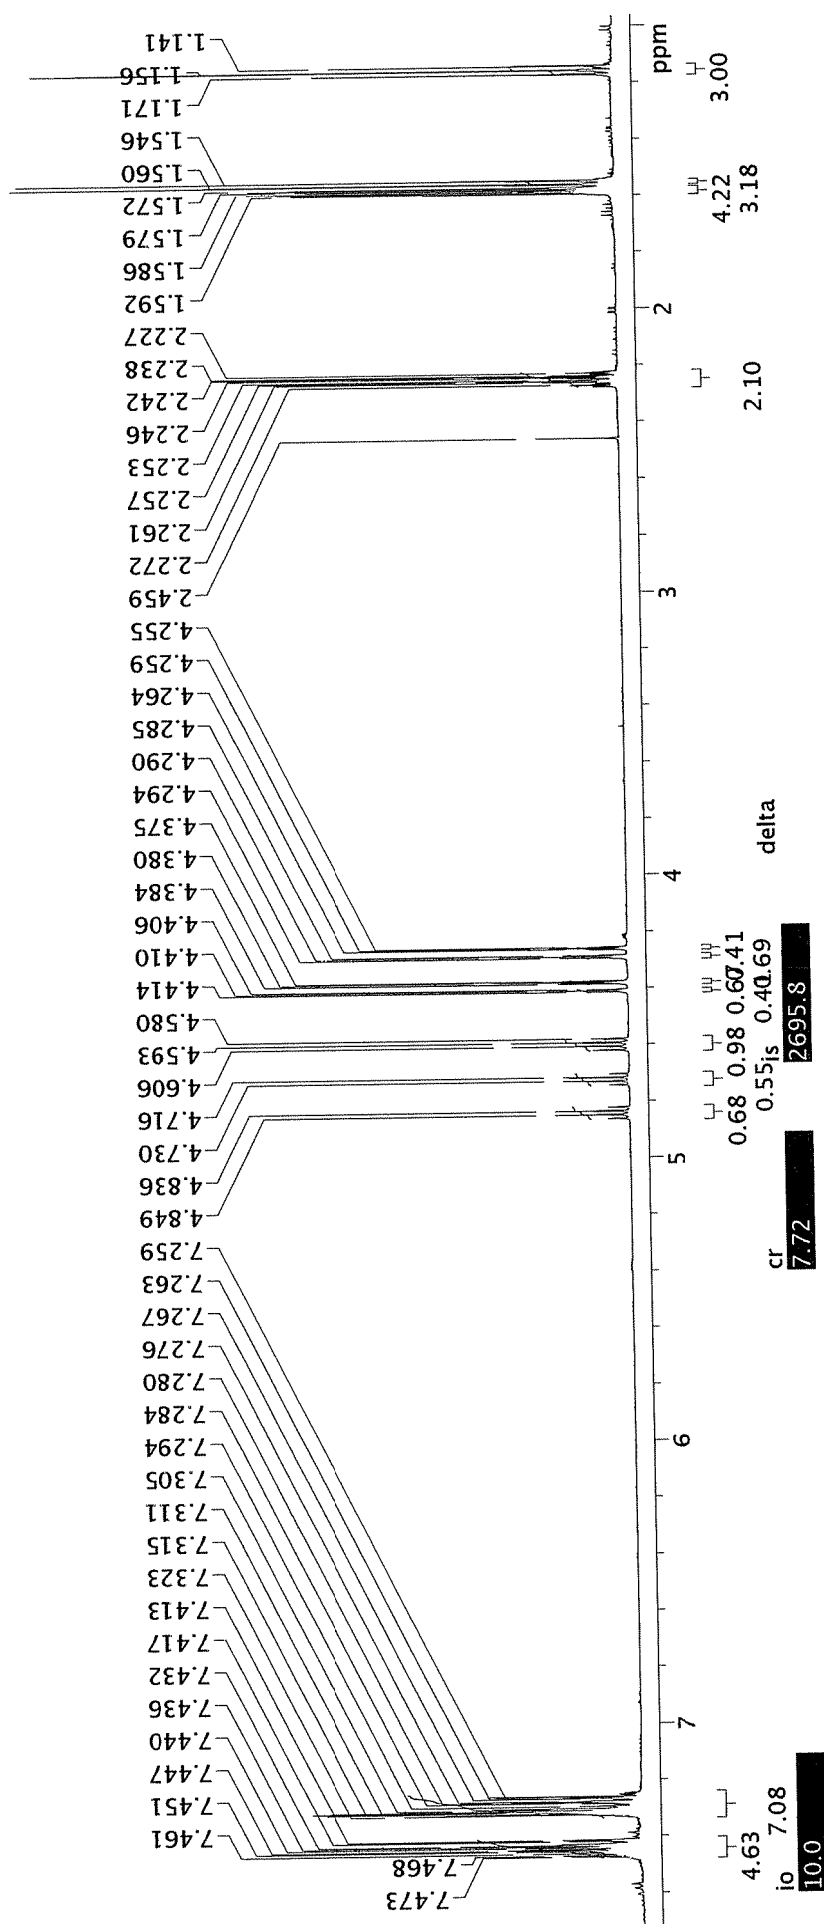

Figure 27. <sup>1</sup>H NMR of compound 34

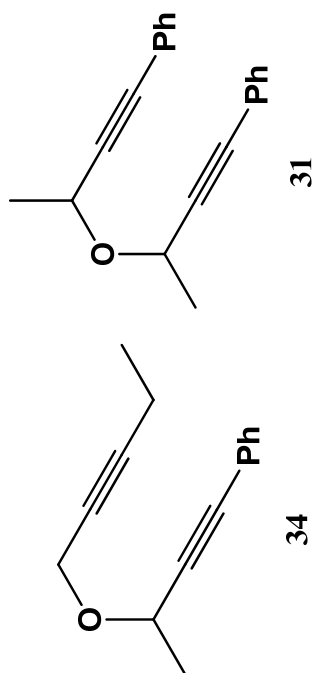

34: 31 ratio = 1: 0.31 (31 exists as two isomers in 1: 0.81 ratio)

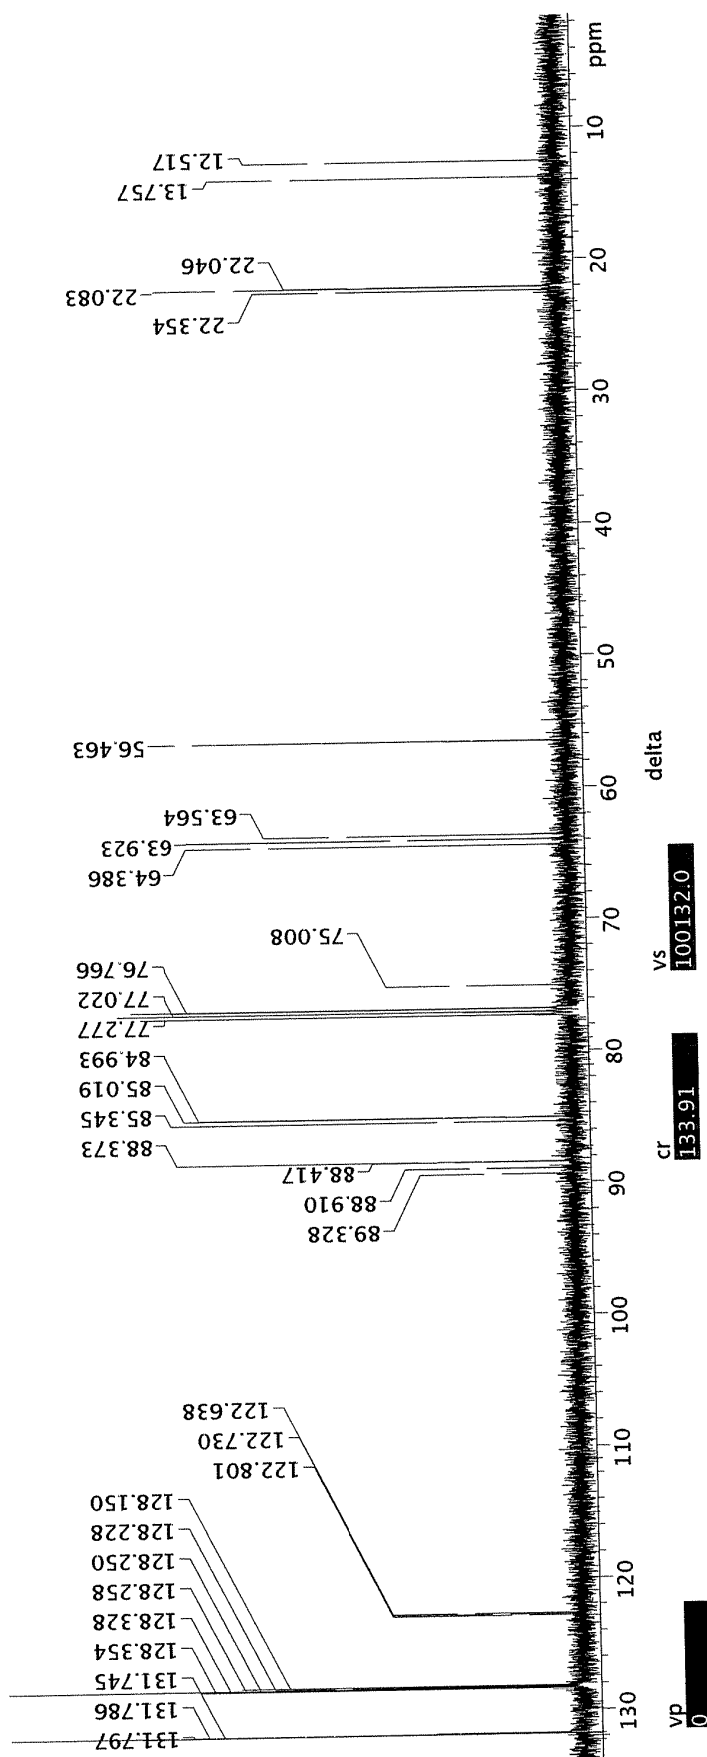

Figure 28. <sup>13</sup>C NMR of compound 34

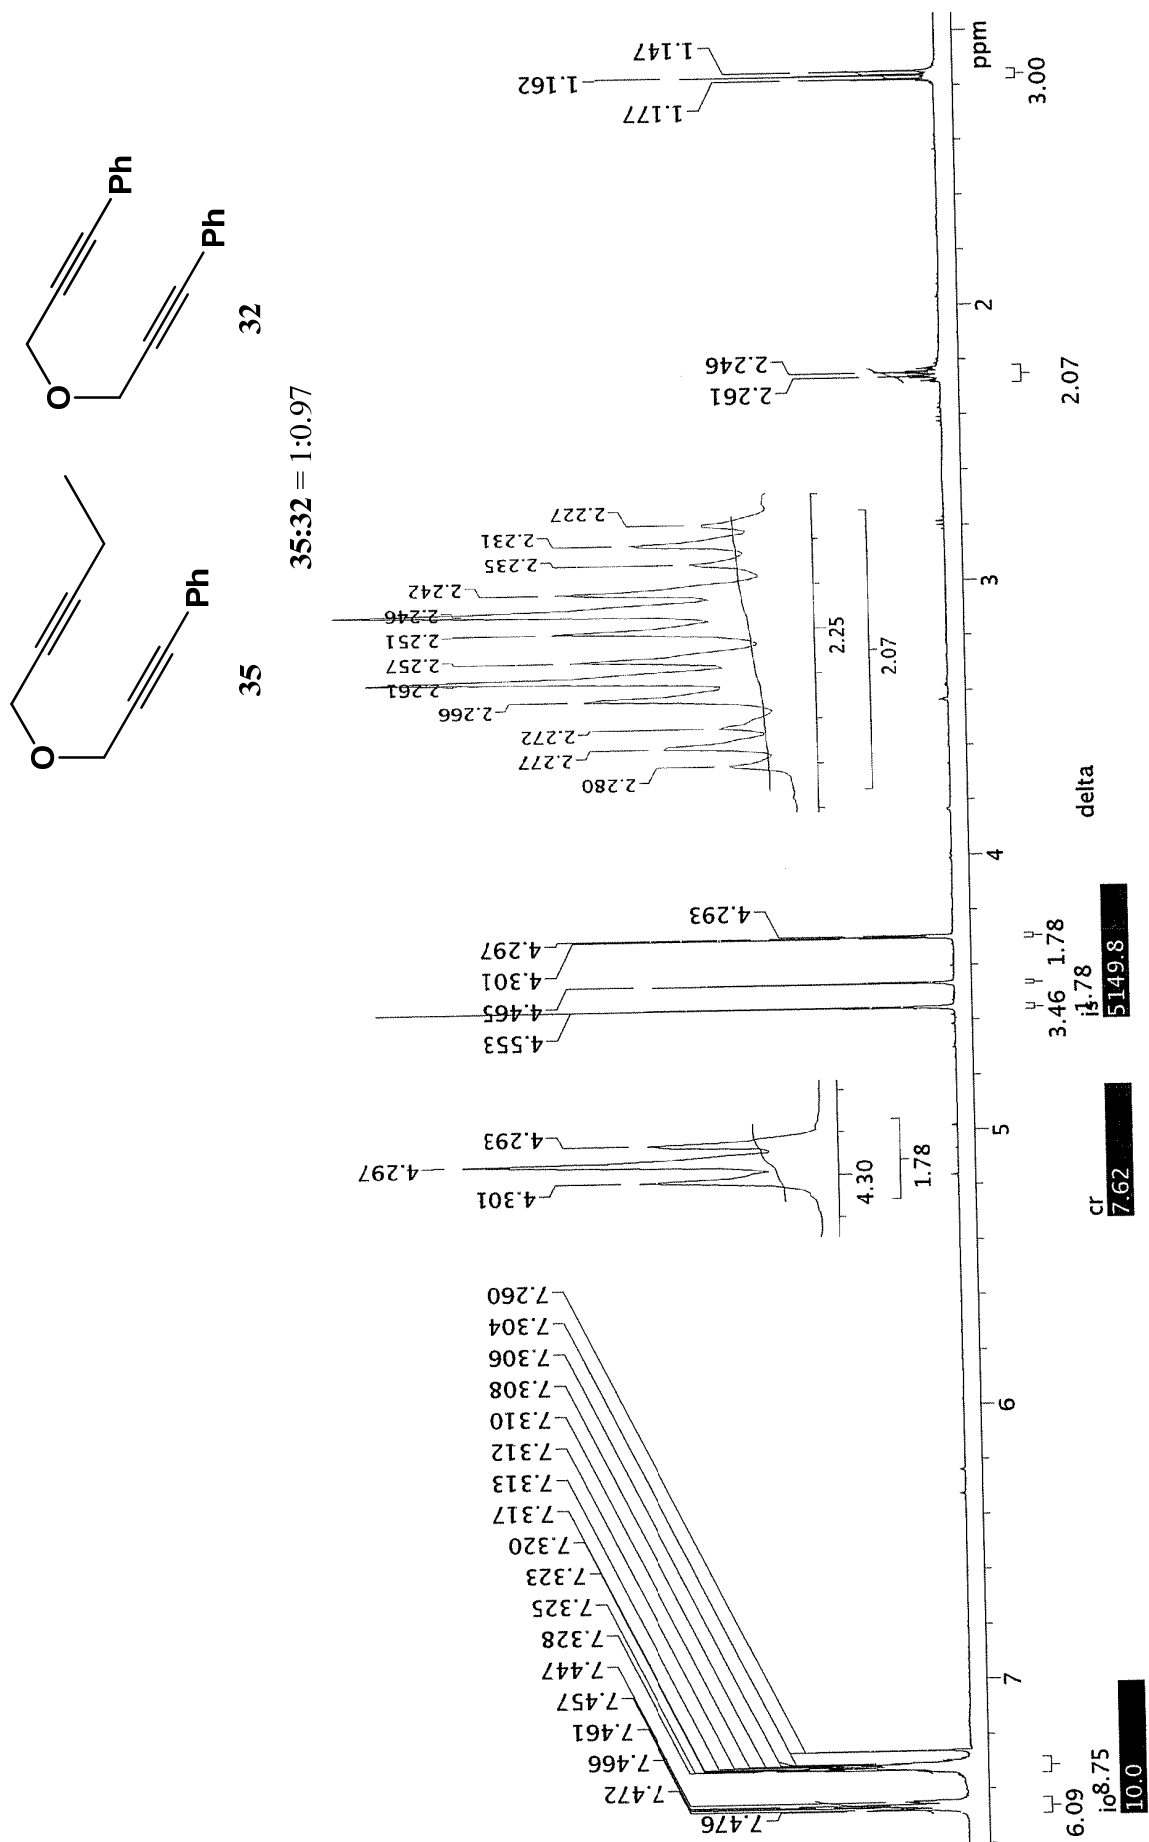

Figure 29. <sup>1</sup>H NMR of compound 35

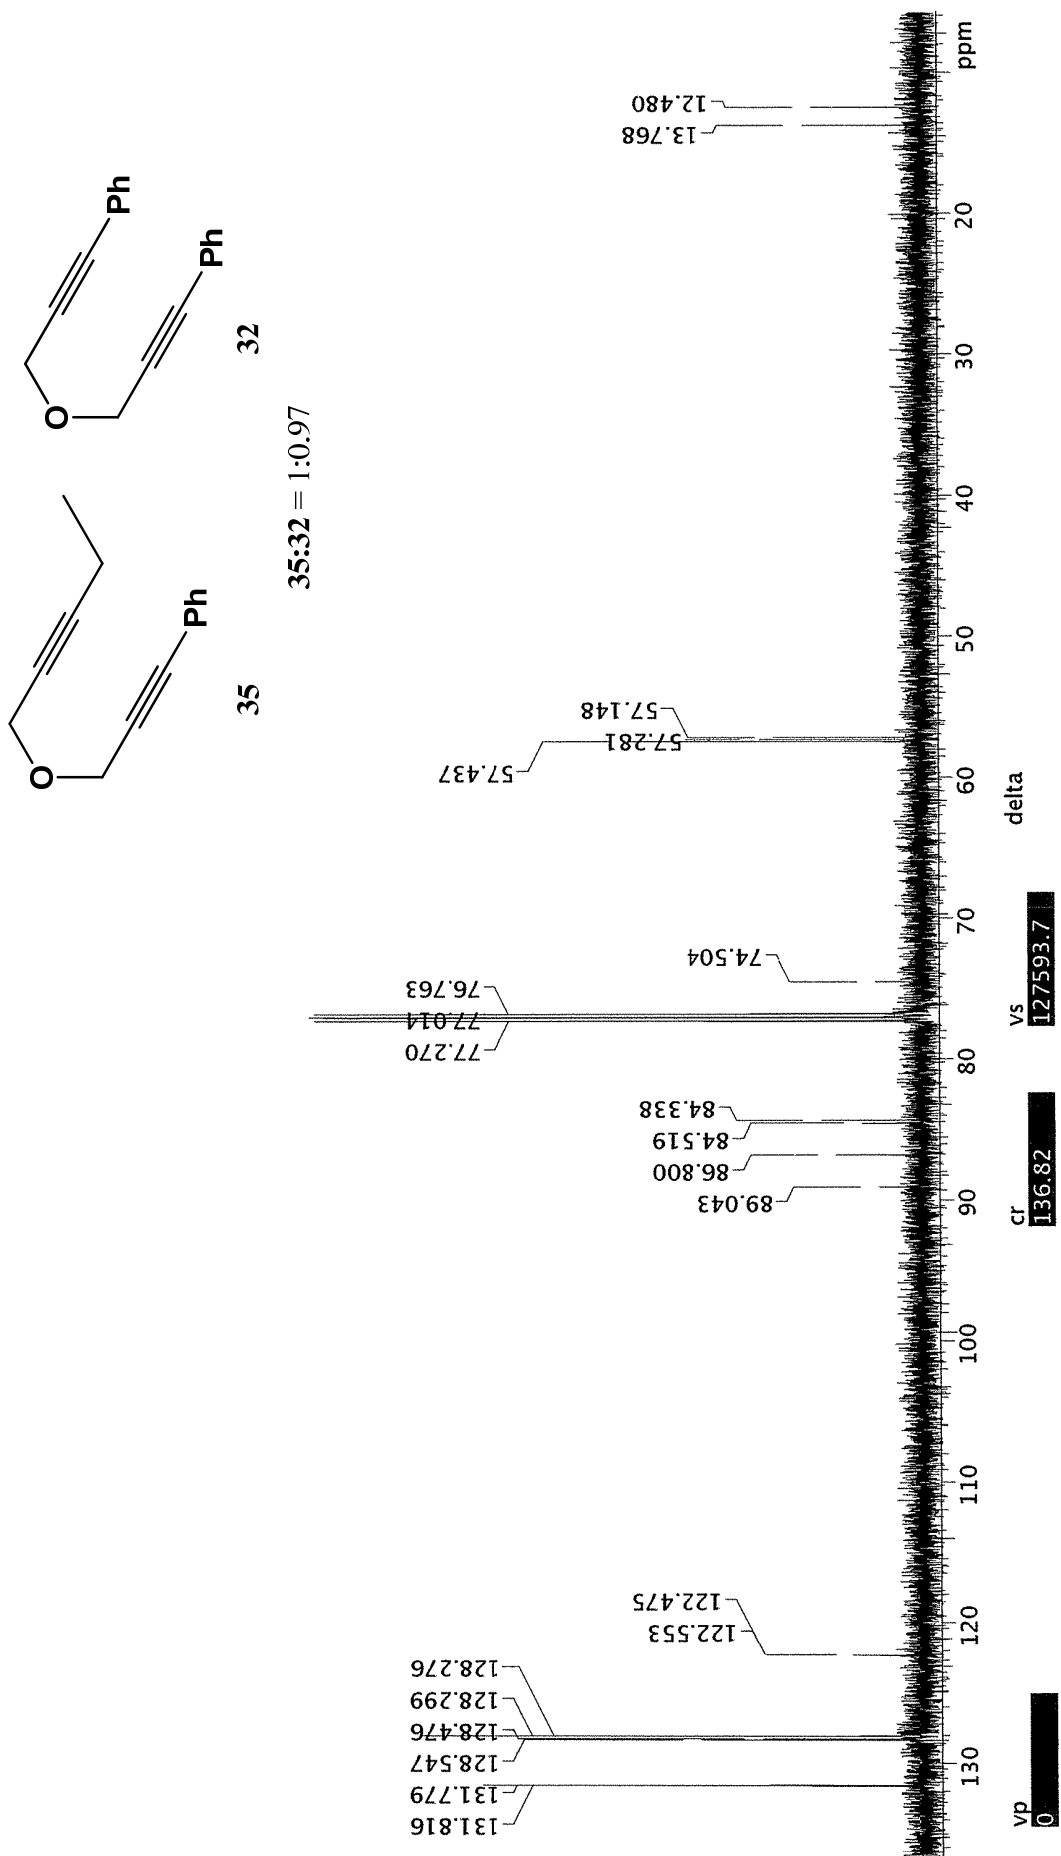

Figure 30.  $^{13}\text{C}$  NMR of compound 35

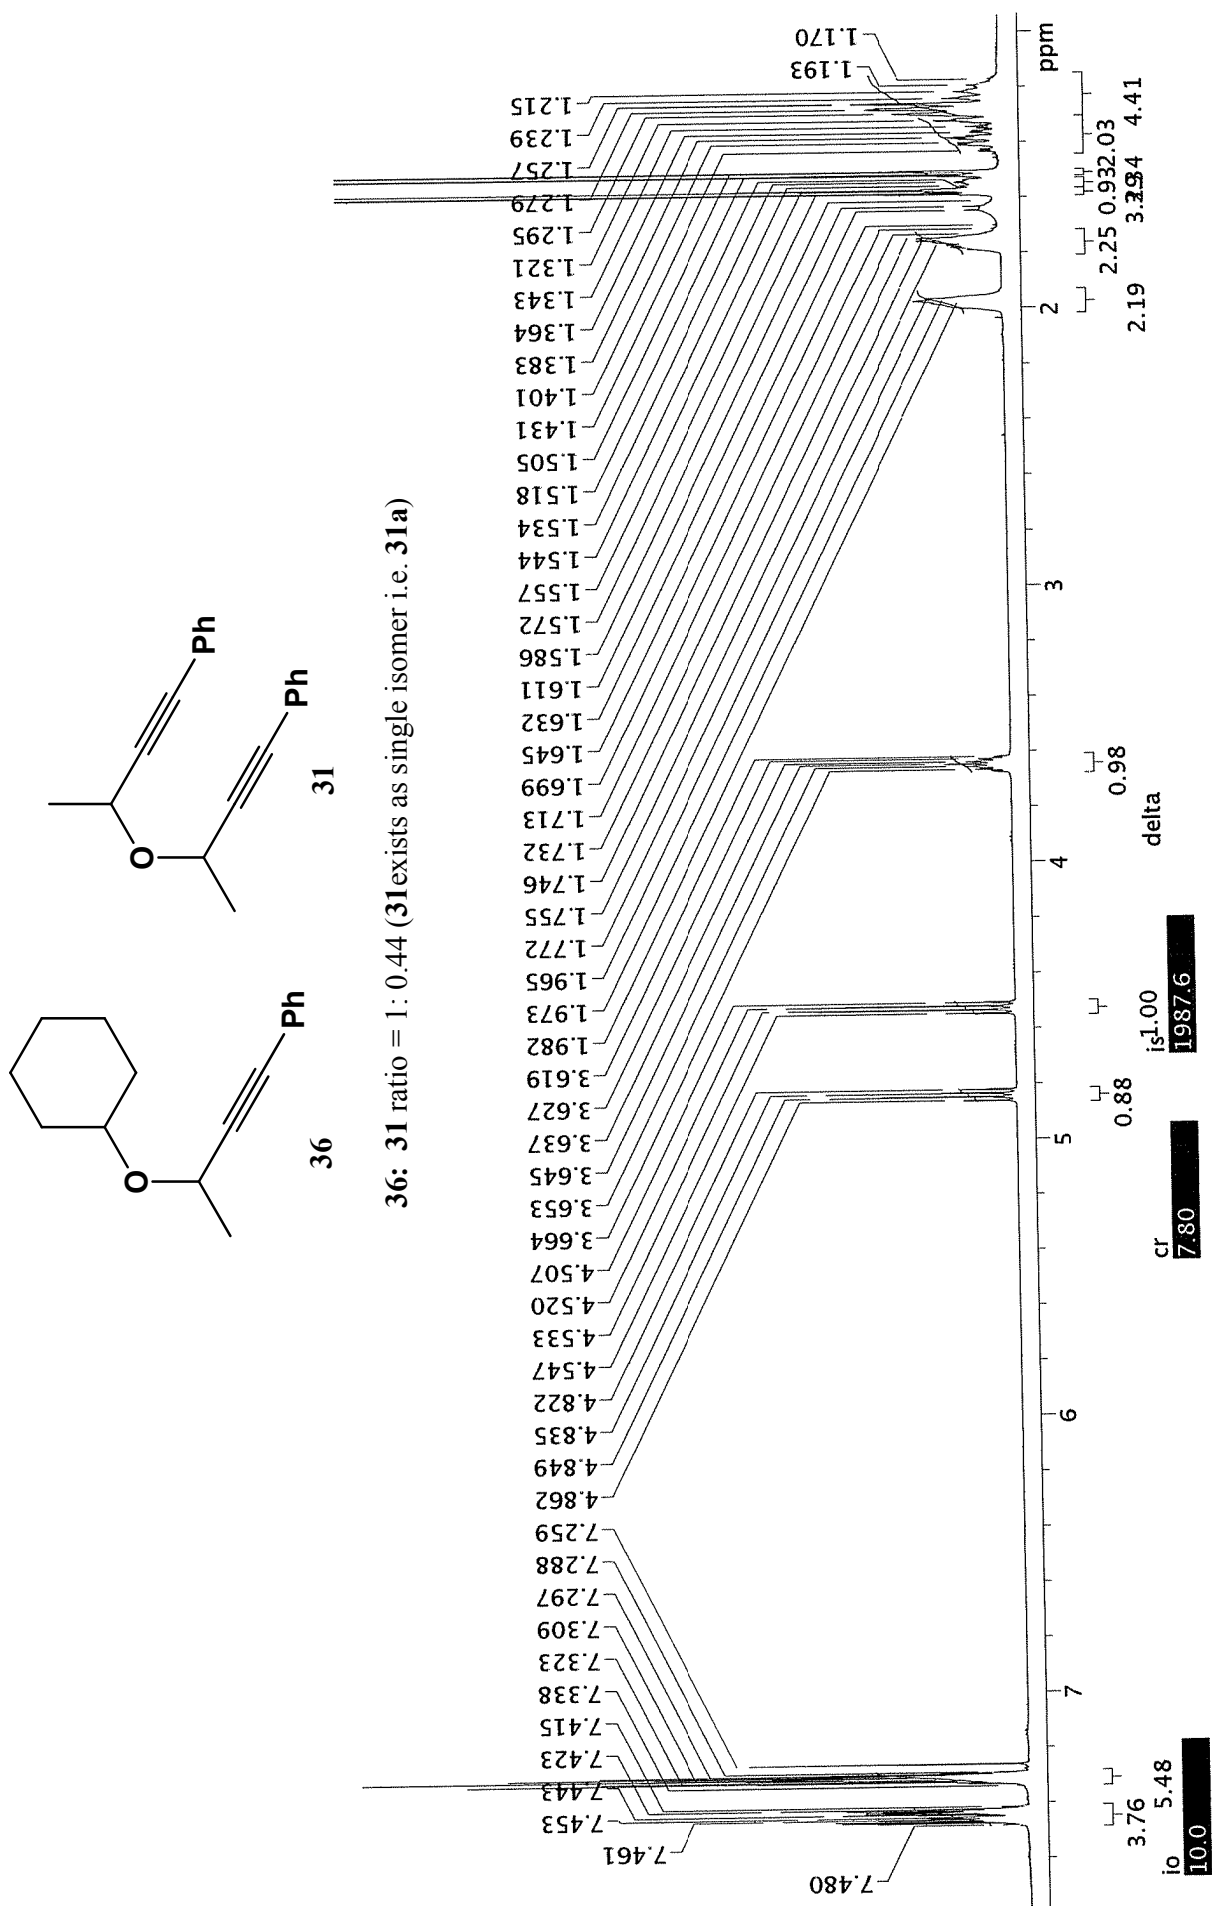



Figure 31. <sup>1</sup>H NMR of compound 36

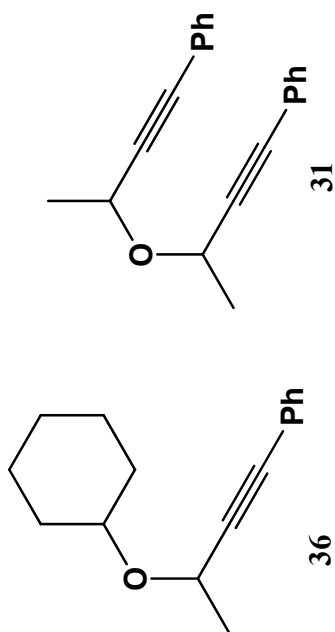

36: 31 ratio = 1 : 0.44 (31 exists as single isomer i.e. 31a)

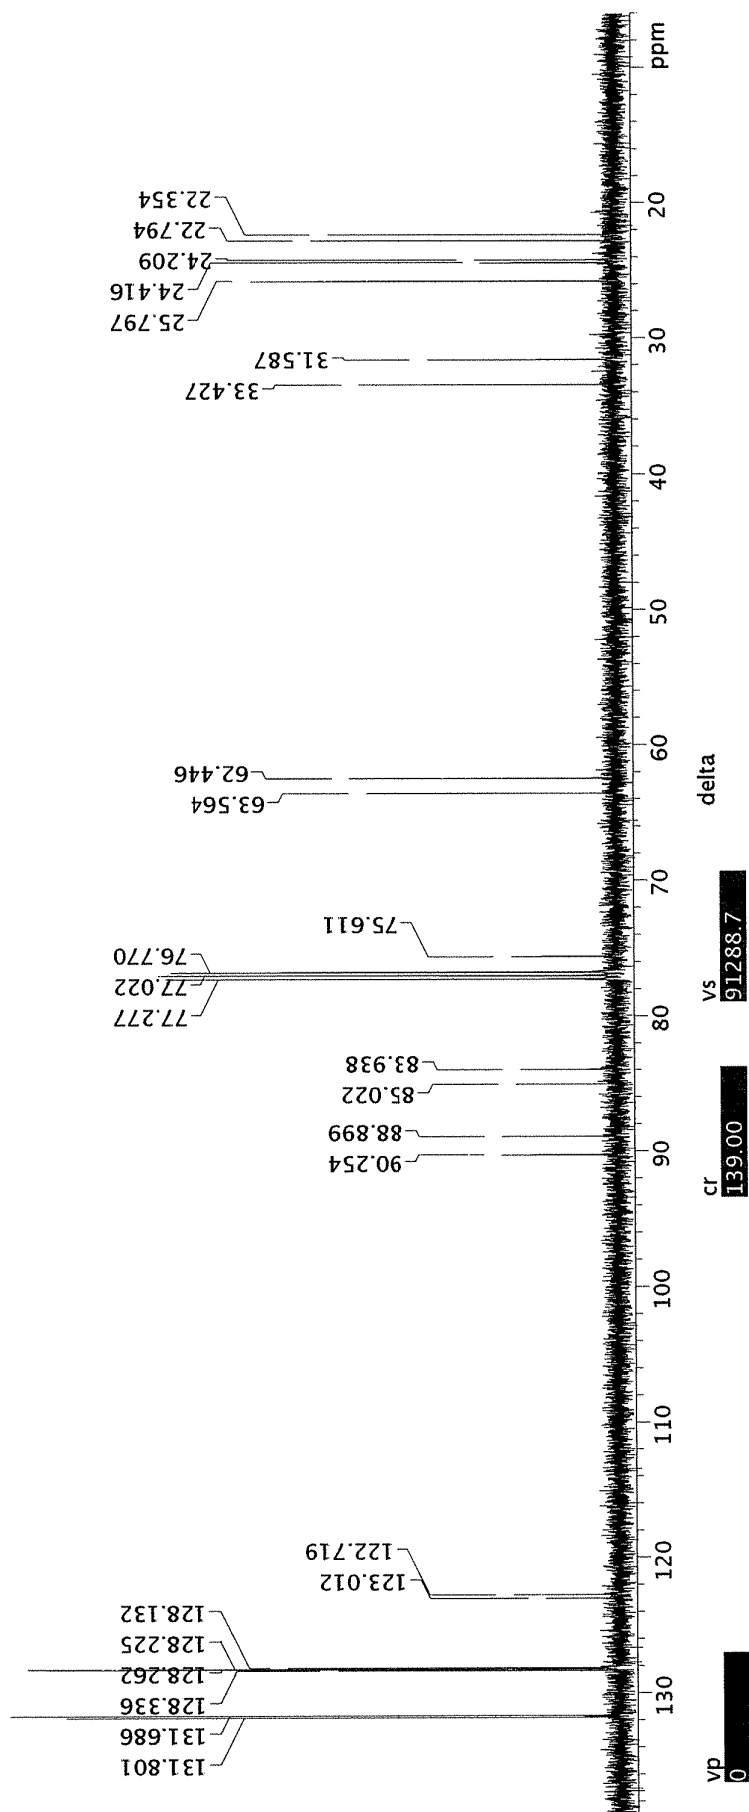

Figure 32. <sup>13</sup>C NMR of compound 36
